1 **Host adaptation and convergent evolution increases**  
2 **antibiotic resistance without loss of virulence in a major**  
3 **human pathogen**

4

5 Running title: Host adaptation and convergent evolution in a major human pathogen

6

7 Alicia Fajardo-Lubián<sup>1,\*</sup>, Nouri L. Ben Zakour<sup>1</sup>, Alex Agyekum<sup>1</sup>, Jonathan R. Iredell<sup>1\*</sup>

8

9 <sup>1</sup> Centre for Infectious Diseases and Microbiology, The Westmead Institute for Medical  
10 Research, The University of Sydney and Westmead Hospital, Sydney, New South Wales,  
11 Australia.

12

13

14 \* Corresponding authors.

15 CIDM, The Westmead Institute for Medical Research, 176 Hawkesbury Road, Westmead,  
16 NSW 2145, Australia. Fax: +61 2 8627 3099.

17 Email address: [jonathan.iredell@sydney.edu.au](mailto:jonathan.iredell@sydney.edu.au) (J.R. Iredell), Tel.: +61286273411

18 Email address: [alicia.fajardolubian@sydney.edu.au](mailto:alicia.fajardolubian@sydney.edu.au) (A. Fajardo-Lubian), Tel.: +612  
19 86273415.

## 21 **Abstract**

22           As human population density and antibiotic exposure increases, specialised bacterial  
23 subtypes have begun to emerge. Arising among species that are common commensals and  
24 infrequent pathogens, antibiotic-resistant ‘high-risk clones’ have evolved to better survive in  
25 the modern human. Here, we show that the major matrix porin (OmpK35) of *Klebsiella*  
26 *pneumoniae* is not required in the mammalian host for colonisation, pathogenesis, nor for  
27 antibiotic resistance, and that it is commonly absent in pathogenic isolates. This is found in  
28 association with, but apparently independent of, a highly specific change in the co-regulated  
29 partner porin, the osmoporin (OmpK36), which provides enhanced antibiotic resistance  
30 without significant loss of fitness in the mammalian host. These features are common in well-  
31 described ‘high-risk clones’ of *K. pneumoniae*, as well as in unrelated members of this  
32 species and similar adaptations are found in other members of the Enterobacteriaceae that  
33 share this lifestyle. Available sequence data indicates evolutionary convergence, with  
34 implications for the spread of lethal antibiotic-resistant pathogens in humans.

35

36

## 38 **Author summary**

39 *Klebsiella pneumoniae* is a Gram-negative enterobacteria and a significant cause of  
40 human disease. It is a frequent agent of pneumonia, and systemic infections can have high  
41 mortality rates (60%). OmpK35 and OmpK36 are the major co-regulated outer membrane  
42 porins of *K. pneumoniae*. OmpK36 absence has been related to antibiotic resistance but  
43 decreased bacterial fitness and diminished virulence. A mutation that constricts the porin  
44 channel (Gly134Asp135 duplication in loop 3 of the porin, OmpK36GD) has been previously  
45 observed and suggested as a solution to the fitness cost imposed by loss of OmpK36.

46 In the present study we constructed isogenic mutants to verify this and test the impact  
47 of these porin changes on antimicrobial resistance, fitness and virulence. Our results show  
48 that loss of OmpK35 has no significant cost in bacterial survival in nutrient-rich  
49 environments nor in the mammalian host, consistent with a predicted role outside that niche.  
50 When directly compared with the complete loss of the partner osmoporin OmpK36, we found  
51 that isogenic OmpK36GD strains maintain high levels of antibiotic resistance and that the  
52 GD duplication significantly reduces neither gut colonisation nor pathogenicity in a  
53 pneumonia mouse model. These changes are widespread in unrelated genomes. Our data  
54 provide clear evidences that specific variations in the loop 3 of OmpK36 and the absence of  
55 OmpK35 in *K. pneumoniae* clinical isolates are examples of successful adaptation to human  
56 colonization/infection and antibiotic pressure, and are features of a fundamental evolutionary  
57 shift in this important human pathogen.

58

## 59 Introduction

60 Host adaptation and niche specialisation is well described in bacteria. As human  
61 population density rises, commensals and pathogens among the Enterobacteriaceae are  
62 transmitted directly from human to human and increasingly exposed to antibiotics. *K.*  
63 *pneumoniae* is now a common cause of healthcare-associated infections and is one of the  
64 most important agents of human sepsis [1]. High morbidity and mortality is associated with  
65 acquired antibiotic resistance, most importantly by horizontal transfer of genes encoding  
66 extended-spectrum  $\beta$ -lactamases (ESBL) [2] and plasmid-mediated AmpC  $\beta$ -lactamases  
67 (pAmpC) [3]. Carbapenem antibiotics have been effective against such isolates for decades  
68 but resistance to these antibiotics is increasingly common in turn [4] and in February 2017,  
69 carbapenem resistant Enterobacteriaceae were listed as highest ('critical') research priorities  
70 by the World Health Organisation. Acquired genes encoding efficient carbapenem  
71 hydrolysing enzymes [5] typically require phenotypic augmentation by permeability  
72 reduction to be clinically relevant in the Enterobacteriaceae. Indeed, clinically significant  
73 carbapenem resistance may even be seen with the less specialised AmpC or ESBL enzymes  
74 in strains with sufficiently reduced outer membrane permeability [6, 7].

75 *K. pneumoniae* expresses two major nonspecific porins (OmpK35 and OmpK36)  
76 through which nutrients and other hydrophilic molecules such as  $\beta$ -lactams diffuse into the  
77 cell [8, 9]. The expression of these two major porins in *K. pneumoniae* are strongly linked  
78 with  $\beta$ -lactam susceptibility [6, 7] and strains lacking both porins exhibit high levels of  
79 resistance [10]. *K. pneumoniae* is commonly present in the human gut [1] but also grows in  
80 low-nutrient and low-osmolarity conditions, with decreased expression of the 'osmoporin',  
81 OmpK36, and increased expression of the 'matrix porin', OmpK35, which has the greater  
82 general permeability. In the mammalian host *in vivo*, and in nutritious media *in vitro*,

83 OmpK36 is the principal general porin and the gateway for  $\beta$ -lactam antibiotics, these being  
84 the most frequently prescribed antibiotic class in humans and the cornerstone of therapy for  
85 serious infections.

86 The fitness cost of certain antibiotic resistance mutations is well described [11-14].  
87 Significantly reduced expression of porins provides some protection from  $\beta$ -lactam  
88 antibiotics but may incur a considerable metabolic cost as vital nutrients are simultaneously  
89 excluded [15]. Outer membrane permeability is thus a balance between self-defence and  
90 competitive fitness [16, 17]. Global antibiotic restriction policies are founded on the premise  
91 of an inverse relationship between competitive fitness and resistance to antibiotics [18] and  
92 the expectation that antibiotic-resistant mutants will fail to successfully compete with their  
93 antibiotic-susceptible ancestors [19]. However, analysis of the principal porin relevant to  
94 infection in the mammalian host, OmpK36, revealed a key role for a transmembrane  $\beta$ -strand  
95 loop (loop3, L3) in the porin inner channel ('eyelet'), which is electronegative at  
96 physiological pH. Minor changes in this region have been observed that are expected to be  
97 relatively permissive of small nutrient molecule diffusion but which may exclude more bulky  
98 anionic carbapenem and cephalosporin antibiotics [20].

99 Highly antibiotic-resistant *K. pneumoniae* is both a critical threat pathogen and a  
100 model of adaptation in a world with increasing human density and antibiotic exposure. The  
101 aim of this study was therefore to understand the pathogenesis and antimicrobial resistance  
102 implications of common changes in major porins that diminish membrane permeability.

## 103 **Materials and methods**

### 104 **Bacterial strains, plasmids, primers and growth conditions.**

105 Bacterial strains, plasmids and primers used in this study are listed in Tables 1 and S1.  
106 Porin mutants were constructed in three antibiotic-susceptible *K. pneumoniae* strains (ATCC  
107 13883, and clinical isolates 10.85 and 11.76 from our laboratory). Bacterial isolates were  
108 stored at -80°C in Nutrient broth (NB) with 20% glycerol and recovered on LB agar plates.  
109 Unless otherwise indicated, strains were routinely grown in Mueller-Hinton broth (MHB, BD  
110 Diagnostics, Franklin lakes, NJ, USA) or Luria-Bertani (LB, Life Technologies, Carlsbad,  
111 CA, USA). *E. coli* and *K. pneumoniae* strains carrying the chloramphenicol-resistant  
112 plasmids pKM200 and pCActus were grown at 30°C on LB agar or in LB broth  
113 supplemented with 20 µg/ml chloramphenicol (Sigma-Aldrich, St. Louis, MO, USA). The  
114 growth of bacterial cells was determined by measuring the optical density at 600 nm (OD<sub>600</sub>)  
115 in an Eppendorf Biophotometer (Eppendorf AG, Hamburg, Germany).

116

**Table 1** Bacterial strains used in this study

| Strain                      | Relevant characteristic(s) <sup>a</sup>                                            | Source or reference <sup>b</sup> |
|-----------------------------|------------------------------------------------------------------------------------|----------------------------------|
| <b><i>K. pneumoniae</i></b> |                                                                                    |                                  |
| ATCC13883                   | <i>Klebsiella pneumoniae</i> , ATCC 13883                                          | ATCC                             |
| ATCCΔOmpK35                 | OmpK35 deletion strain of ATCC 13883; Tet <sup>r</sup>                             | TS                               |
| ATCCOmpK36GD                | OmpK36 L3 GD strain of ATCC 13883                                                  | TS                               |
| ATCCΔOmpK36                 | OmpK36 deletion strain of ATCC 13883; Km <sup>r</sup>                              | TS                               |
| ATCCΔOmpK35OmpK36GD         | OmpK35 deletion strain with OmpK36 L3 GD; Tet <sup>r</sup>                         | TS                               |
| ATCCΔOmpK35ΔOmpK36          | OmpK35 and OmpK36 deletion strain of ATCC 13883; Tet <sup>r</sup> :Km <sup>r</sup> | TS                               |
| 10.85                       | Wild-type <i>Klebsiella pneumoniae</i> , clinical isolate                          | [21]                             |
| 10.85ΔOmpK35                | OmpK35 deletion strain of 10.85; Tet <sup>r</sup>                                  | TS                               |
| 10.85OmpK36GD               | OmpK36 L3 GD strain of ATCC 13883                                                  | TS                               |
| 10.85ΔOmpK36                | OmpK36 deletion strain of ATCC 13883; Km <sup>r</sup>                              | TS                               |
| 10.85ΔOmpK35OmpK36GD        | OmpK35 deletion strain with OmpK36 L3 GD; Tet <sup>r</sup>                         | TS                               |
| 10.85ΔOmpK35ΔOmpK36         | OmpK35 and OmpK36 deletion strain of ATCC 13883; Tet <sup>r</sup> :Km <sup>r</sup> | TS                               |
| 11.76                       | Wild-type <i>Klebsiella pneumoniae</i> , clinical isolate                          | [21]                             |
| 11.76ΔOmpK35                | OmpK35 deletion strain of ATCC 13883; Tet <sup>r</sup>                             | TS                               |
| 11.76OmpK36GD               | OmpK36 L3 GD strain of ATCC 13883                                                  | TS                               |
| 11.76ΔOmpK36                | OmpK36 deletion strain of ATCC 13883; Km <sup>r</sup>                              | TS                               |
| 11.76ΔOmpK35OmpK36GD        | OmpK35 deletion strain with OmpK36 L3 GD; Tet <sup>r</sup>                         | TS                               |
| 11.76ΔOmpK35ΔOmpK36         | OmpK35 and OmpK36 deletion strain of ATCC 13883; Tet <sup>r</sup> :Km <sup>r</sup> | TS                               |
| JIE1333                     | OmpK36 L3 GD <i>K. pneumoniae</i> , clinical isolate                               | [21]                             |
| JIE1334                     | OmpK36 L3 GD <i>K. pneumoniae</i> , clinical isolate                               | [21]                             |
| JIE1335                     | OmpK36 L3 GD <i>K. pneumoniae</i> , clinical isolate                               | [21]                             |
| JIE1348                     | OmpK36 L3 GD <i>K. pneumoniae</i> , clinical isolate                               | [21]                             |
| JIE1383                     | OmpK36 L3 GD <i>K. pneumoniae</i> , clinical isolate                               | [21]                             |
| JIE1462                     | OmpK36 L3 GD <i>K. pneumoniae</i> , clinical isolate                               | [21]                             |
| JIE1474                     | OmpK36 L3 GD <i>K. pneumoniae</i> , clinical isolate                               | [21]                             |
| JIE1482                     | OmpK36 L3 GD <i>K. pneumoniae</i> , clinical isolate                               | [21]                             |
| JIE2038                     | OmpK36 L3 GD <i>K. pneumoniae</i> , clinical isolate                               | [21]                             |
| JIE2055                     | OmpK36 L3 GD <i>K. pneumoniae</i> , clinical isolate                               | [21]                             |
| JIE2218                     | OmpK36 L3 GD <i>K. pneumoniae</i> , clinical isolate                               | [21]                             |
| JIE4101                     | OmpK36 L3 TD <i>K. pneumoniae</i> , clinical isolate                               | WH                               |
| JIE4111                     | OmpK36 L3 TD <i>K. pneumoniae</i> , clinical isolate                               | WH                               |
| JIE4212                     | OmpK36 L3 GD <i>K. pneumoniae</i> , clinical isolate                               | WH                               |
| JIE4609                     | OmpK36 L3 TD <i>K. pneumoniae</i> , clinical isolate                               | WH                               |
| JIE4656                     | OmpK36 L3 TD <i>K. pneumoniae</i> , clinical isolate                               | WH                               |
| JIE4735                     | OmpK36 L3 TD <i>K. pneumoniae</i> , clinical isolate                               | WH                               |

## *E. coli*

DH5 $\alpha$  *hsdR17 recA1*; high efficiency transformation [22]  
strain

S17  $\lambda$ pir *λpir lysogen of S17 (Tp<sup>r</sup> Sm<sup>r</sup> thi pro Δ*hsdR hsdM*<sup>+</sup> [23]  
*recA* RP4::2-Tc::Mu-*km*::Tn7)*

<sup>a</sup>L3 GD: Gly+Asp duplication in loop 3, ATCC, American Type Culture collection, Tet<sup>r</sup>;  
Tetracycline resistant, Km<sup>r</sup>; Kanamycin resistant

<sup>b</sup>TS, This study. WH, Westmead Hospital.

117

## 118 **Construction of porin mutants**

119 Chemical transformation, conjugations and electroporation were carried out using  
120 standard protocols. Platinum pfx DNA polymerase (Invitrogen, USA) was used to amplify  
121 blunt-ended PCR products. All PCR products were purified (PureLink Quick PCR  
122 Purification Kit; Invitrogen, USA). PCR and sequencing was used to confirm all constructs.  
123 Genomic DNA extractions were performed using a DNeasy Blood and Tissue kit (Qiagen,  
124 Valencia, CA, USA) and plasmid DNA using a PureLink Quick Plasmid Miniprep kit (Life  
125 Technologies, Carlsbad, CA, USA) or a HiSpeed Plasmid Midi Kit (Qiagen, Valencia, CA,  
126 USA).

127 Porin deletions mutants of *K. pneumoniae* ATCC 13883, 10.85 and 11.76 were  
128 created by introduction of *tetA* (tetracycline-resistance) or *aphA-3* (kanamycin-resistance)  
129 into unique sites in *ompK35* and *ompK36* (HincII and StuI, respectively) which had been  
130 previously cloned into pGEM-T easy (Promega, Madison, WI, USA). The disrupted porin  
131 genes were then cloned into pCACTus suicide temperature-sensitive vector (pJIAF-7 to  
132 pJIAF-12) to replace the respective chromosomal genes by homologous recombination [24].  
133 Confirmation of correct single-copy chromosomal mutations were finally verified by PCR  
134 (Table S1).

135 OmpK36GD mutants were obtained by amplification of OmpK36 from each parental  
136 strain using K36GD1 / K36GD2 and K36GD3 / K36GD4 primers (Table S1). The amplicon,



137 containing a GD duplication in L3, was cloned first in pGEM-T easy and after digestion with  
138 *SphI* and *SacI* (New England Biolabs, MA, USA) was introduced into pCACTus. The  
139 pCACTus-based construct (pJIAF-13 to pJIAF-18) was transformed into S17 $\lambda$ pir and  
140 conjugated into *K. pneumoniae*  $\Delta$ OmpK36 (kanamycin-resistance mutant) where the  
141 interrupted gene was replaced by OmpK36 porin with GD duplication in L3 by homologous  
142 recombination. Mutants were selected by loss of kanamycin resistance and confirmed by  
143 PCR and sequencing.

144 Double mutants ( $\Delta$ OmpK35 $\Delta$ OmpK36 and  $\Delta$ OmpK35OmpK36GD) were constructed  
145 using lambda Red-mediated recombineering as described previously [25, 26], with some  
146 modifications. A tetracycline cassette flanked by OmpK35 deletion (~2.5 kb in size) was  
147 PCR amplified from an OmpK35 deletion mutant ( $\Delta$ OmpK35; tetracycline resistant-  
148 previously obtained) using primers ompK35X-F and ompK35X-R (Table S1) and PCR  
149 products were purified. Red Helper plasmid pKM200 was electroporated into  $\Delta$ OmpK36 or  
150 OmpK36GD single mutants. *ompK35:tetA* fragments were electroporated into  $\Delta$ OmpK36 or  
151 OmpK36GD clones carrying pKM200. Bacteria were grown at 30°C for 2 h with agitation  
152 (225 rpm) followed by overnight incubation at 37°C. Different dilutions of the electroporated  
153 cells were spread on LB agar plates containing 10  $\mu$ g/ml tetracycline to select for  
154 transformants at 37°C. The correct structure was confirmed by sequencing of PCR amplicons  
155 (primers ompK35F1 and ompK35R2, Table S1).

## 156 **Antimicrobial susceptibility tests**

157 Susceptibilities to cefazolin (CFZ, Sigma-Aldrich, St. Louis, MO, USA), cephalothin  
158 (CEF, Sigma-Aldrich, St. Louis, MO, USA), cefoxitin (FOX, Sigma-Aldrich, St. Louis, MO,  
159 USA), cefuroxime (CXM, Sigma-Aldrich, St. Louis, MO, USA), cefotaxime (CTX, A.G.  
160 Scientific, Inc., San Diego, CA, USA), ceftazidime (CAZ, Sigma-Aldrich, St. Louis, MO,

161 USA), ertapenem (ETP, Sigma-Aldrich, St. Louis, MO, USA), imipenem (IPM, Sigma-  
162 Aldrich, St. Louis, MO, USA), meropenem (MEM, A.G Scientific, Inc, San Diego, CA,  
163 USA) and ampicillin (MEM, A.G Scientific, Inc, San Diego, CA, USA) were performed by  
164 broth microdilution in cation-adjusted Mueller-Hinton (MH) broth (Becton Dickinson) with  
165 inocula of  $5 \times 10^5$  CFU/ml in accordance with CLSI MO7-A9 recommendations [27]. All  
166 MICs were determined in triplicate at least on three separate occasions to obtain at least 9  
167 discrete data points and compared with EUCAST and CLSI clinical breakpoints for all  
168 antibiotics [28, 29]. *E. coli* (ATCC25922) and *Pseudomonas aeruginosa* (ATCC27853) were  
169 included in each experiment as quality controls.

#### 170 **Transfer of resistance genes**

171 The filter mating method [30] was used to transfer plasmids from clinical isolates  
172 carrying *bla*<sub>CTX-M-15</sub>, (pJIE143) [31] *bla*<sub>IMP-4</sub> (pEI1573) [32] and *bla*<sub>KPC-2</sub> (pJIE2543-1) [33] to  
173 *K. pneumoniae* ATCC 13883 and porin mutants ( $\Delta$ OmpK35,  $\Delta$ OmpK36, OmpK36GD,  
174  $\Delta$ OmpK35 $\Delta$ OmpK36 and  $\Delta$ OmpK35OmpK36GD). The presence of resistance genes in  
175 transconjugants was confirmed by PCR [33-35] and the presence of plasmids of the expected  
176 size confirmed by S1 nuclease pulsed-field gel electrophoresis (Promega, Madison, WI,  
177 USA) [36, 37].

#### 178 **Outer membrane porin investigation**

179 Isolates were grown overnight in MHB. Bacteria were disrupted by sonication and  
180 outer membrane porins (OMPs) isolated with sarcosyl (Sigma-Aldrich, St. Louis, MO, USA),  
181 as previously described [21, 38]. Samples were boiled, analyzed by sodium dodecyl sulfate-  
182 polyacrylamide gel electrophoresis (SDS-PAGE) (12% separating gels), and stained with  
183 Imperial protein stain (Thermo Scientific, Rockford, IL, USA), following the manufacturer's  
184 instructions. *K. pneumoniae* ATCC 13883, which produces both porins (OmpK35 and

185 OmpK36) was used as a control [39]. Colour prestained protein standard, broad range (11-  
186 245 KDa) (New England Biolabs, MA, USA) was used as size marker.

### 187 **Real-time reverse transcription-PCR**

188 The expression levels of the different porins were measured by real-time RT-PCR.  
189 Cells were harvested in logarithmic phase at an OD<sub>600</sub> of 0.5-0.6. Total RNA was isolated  
190 using RNeasy system (Qiagen). RNA was treated with DNase (TURBO DNA-free Kit,  
191 Ambion). cDNA was synthesized by high-capacity cDNA reverse transcriptase kit (Applied  
192 Biosystems). One microgram of the initially isolated RNA was used in each reverse  
193 transcription reaction. cDNA was diluted 1:10 and 2 µl were used for the real-time reaction.  
194 Three biological replicates, each with three technical replicates, were used in each of the  
195 assays. The relative levels of expression were calculated using the threshold cycle ( $2^{-\Delta\Delta CT}$ )  
196 method [40]. The expression of *rpoD* was used to normalize the results. The primers used are  
197 listed in Table S1.

### 198 **Determination of growth rate**

199 Growth rates were determined as previously described [41]. Overnight broth cultures  
200 were diluted 1:1000. Six aliquots of 200 µl per dilution were transferred into 96-well  
201 microtiter plates (Corning Incorporated, Durham, NC, USA). Samples were incubated at  
202 37°C and shaken before measurement of OD<sub>600</sub> in a Vmax Kinetic microplate reader  
203 (Molecular Devices, Sunnyvale, CA, USA). Growth rates and generation times were  
204 calculated on OD<sub>600</sub> values between 0.02-0.09. The relative growth rate was calculated by  
205 dividing the generation time of each mutant by the generation time of the parental strain (*K.*  
206 *pneumoniae* ATCC 13883, 10.85 or 11.76) which was included in every experiment.  
207 Experiments were performed in sextuplicate in three independent cultures on three different  
208 occasions. Results are expressed as means ± standard errors of the means.

## 209 ***In vitro* competition experiment**

210 Competition experiments were carried out as described previously [42]. Viable cell  
211 counts were obtained by plating every 24 h on antibiotic-free LB agar and on LB agar  
212 supplemented with antibiotic (kanamycin 20 µg/ml or tetracycline 10 µg/ml) to distinguish  
213 between mutants and wild-type cells. PCR (with pairs K36GD4 / K36GD11 or K36GD12 /  
214 K36GD13 primers, Table S1) was performed for the calculation of the competition results  
215 between the parental strain and OmpK36GD mutant (in this particular experiments, bacteria  
216 were diluted in fresh media every 24h and PCR on 100 viable colonies of each replicate was  
217 performed every 48h). All experiments were carried out in triplicate with three independent  
218 cultures. Mean values of three independent experiments ± standard deviation were plotted.

## 219 **Mouse model of gastrointestinal tract colonization (GI) and competition experiments.**

220 Five to six week-old female BALB/c mice (Animal Resources Centre (ARC), Sydney,  
221 Australia) were used for GI colonization [43-45] and competition experiments. Mice were  
222 caged in groups of three and had unrestricted access to food and drinking water. Faecal  
223 samples were collected and screened for the presence of indigenous *K. pneumoniae* before  
224 inoculation. For the colonization study, three mice were inoculated with the parental strain or  
225 a porin mutant ( $1 \times 10^{10}$  CFU / mouse), suspended in 20% (w/v) sucrose. For individual  
226 colonization, ampicillin was added to drinking water on day 4 (0.5 g / L) after an inoculation  
227 [46]. For the competition experiment, equal volumes of the parental strain and each mutant or  
228 equal volume of different mutants ( $1 \times 10^{10}$  CFU / mouse) were mixed and suspended in 20%  
229 (w/v) sucrose. Colonization was maintained with ampicillin 0.5 g / L throughout the  
230 experiment [47-49]. Faeces samples were collected every second day, emulsified in 0.9%  
231 NaCl and appropriate serial dilutions plated on MacConkey-inositol-carbenicillin agar, which  
232 selectively recovers for *K. pneumoniae* [50].

233 **Mouse model of virulence: intranasal infection.**

234 Five-six week-old female BALB/c mice [Animal Resources Centre (ARC), Sydney,  
235 Australia] used in the inhalation (pneumonia) model [51-53] were exposed to ATCC 13883  
236 and 10.85 and their isogenic  $\Delta$ OmpK35OmpK36GD mutants. Overnight bacterial cultures  
237 were harvested, washed and resuspended at  $10^9$  CFU in 20  $\mu$ l of saline and inoculated into the  
238 nasal passages. A control group of mice was inoculated with saline. Following infection,  
239 survival studies were performed (10 mice per strain). Organ (lung and spleen) and blood  
240 infection burdens were also assessed at various points throughout the infection period, by  
241 plating out blood and homogenised tissue onto LB agar, and counting CFU (5 mice per strain,  
242 per time point).

243 **Structure modelling of OmpK36 variants**

244 Tri-dimensional structural models of ATCC13883 OmpK36 and its mutated variant  
245 OmpK36GD were computed with ProMod3 Version 1.1.0 on the SWISS-MODEL online  
246 server [54] using the target–template alignment method. The best scoring model used as a  
247 template was 5nupA (93.84% sequence identity, with a QMEAN equal to -2.29 and -2.14,  
248 respectively for both sequences). For comparison purposes, models were also computed using  
249 the second best OmpK36 structure available in PDB (1osmA). All predicted models were  
250 evaluated using MolProbity [55, 56] and Verify3D [57, 58], with Ramachandran plots  
251 generated by MolProbity indicating for all computed models that at least >98% of residues  
252 were in allowed regions. Predicted structures were displayed by PyMol software (version  
253 2.1.1) [59].

254 Additionally, the specific impact of di-nucleotide insertions was also investigated by  
255 altering the OmpK6 structure under PDB accession 5nupA, adding either the di-nucleotide

256 GD-, TD- or SD-, after position G113 and modeling the resulting variant sequences in the  
257 same manner as mentioned above.

## 258 **Genome sequencing and comparative analysis**

259 Genomic DNA was extracted from 2 ml overnight cultures using the DNeasy Blood  
260 and Tissue kit (Qiagen). Paired-end multiplex libraries were prepared using the Illumina  
261 Nextera kit in accordance with the manufacturer's instructions. Whole genome sequencing  
262 was performed on Illumina NextSeq 500 (150bp paired-end) at the Australian Genome  
263 Research Facility (AGRF). Raw sequence reads are available on NCBI under Bioproject  
264 accession number PRJNA430457. Reads were quality-checked, trimmed and assembled  
265 using the Nullarbor pipeline v.1.20 (available at: <https://github.com/tseemann/nullarbor>), as  
266 previously described [60], but with the exception of the assembly step which was performed  
267 using Shovill (available at: <https://github.com/tseemann/shovill>), a genome assembler  
268 pipeline wrapped around SPAdes v.3.9.0 [61] which includes post-assembly correction.  
269 Assemblies were also reordered against reference strain *K. pneumoniae* 30660/NJST258\_1  
270 (accession number CP006923) using progressive Mauve v.2.4.0 [62] prior to annotation with  
271 Prokka [63] and screened for antibiotic resistance genes using Abricate v.0.6 (available at:  
272 <https://github.com/tseemann/abricate>).

## 273 **Population analysis**

274 To investigate the significance of *ompK35* and *ompK36* mutations in a wider  
275 population, we collected a total of 1,557 draft and complete *K. pneumoniae* genomes publicly  
276 available in Genbank (Feb 2017, Table S2). Sequences were typed using Kleborate v0.1.0  
277 [64] to identify MLST (Table S3) and minimum spanning trees were generated using  
278 Bionumerics v.7.60. Presence and absence of porins were assessed in the pangenome using  
279 Roary v3.6.0 [65] with default parameters and mutations in loop 3 (L3) identified using  
280 BLAST. The 2,253,033 nt core genes alignment predicted by Roary was used to build a

281 maximum-likelihood tree using IQ-TREE v1.6.1 [66], with a GTR+G+I nucleotide  
282 substitution model and branch supports assessed with ultrafast bootstrap approximation (1000  
283 replicates). Trees were visualized alongside contextual information with Phandango [67].

284 Statistical analysis was performed using Chi-tests and extended mosaic plots in R, to  
285 determine associations between ST, porin defects and other relevant population metrics such  
286 as country of origin, year and source of isolation. Relevant R scripts were also made available  
287 at [https://github.com/nbenzakour/Klebsiella\\_antibiotics\\_paper](https://github.com/nbenzakour/Klebsiella_antibiotics_paper).

## 288 **Ethics Statement**

289 For gastrointestinal gut colonization, animal experiments were approved by the  
290 Western Sydney Local Health District Animal Ethics Committee (AEC Protocol no.  
291 4205.06.13).

292 For intranasal infection, animal experiments were approved by the Western Sydney  
293 Local Health District Animal Ethics Committee (AEC Protocol no. 4275.06.17).

294 All research and animal care procedures were in accordance with the “Australian  
295 Code of Practice for the Care and Use of Animals for Scientific Purposes”, 8<sup>th</sup> Edition (2013)  
296 (National Health and Medical Research Council, Australian Government).

297  
298

## 299 **Results**

### 300 **Outer membrane porins and resistance to beta-lactam antibiotics**

301 Minimal inhibitory concentrations for commonly used carbapenems (Ertapenem and  
302 Meropenem), third-generation cephalosporins (Ceftazidime, Cefotaxime and Ceftriaxone),

303 cephamycins (also called ‘second generation cephalosporins’, Cefoxitin and Cefuroxime),  
 304 first generation cephalosporins (Cephalothin and Cefazolin), and the semi-synthetic penicillin  
 305 Ampicillin were determined in three *K. pneumoniae* strains and their isogenic porin mutants,  
 306 with representative results in Table 2 (for complete results, see Table S4). The SHV enzyme  
 307 characteristically expressed by *K. pneumoniae* hydrolyses ampicillin very effectively,  
 308 providing high MICs to ampicillin [68-71], but does not provide clinically important  
 309 resistance to cephalosporins or carbapenems in the setting of normal membrane permeability.

310 Loss of OmpK36 ( $\Delta$ K36 in Tables 2 and S4) is associated with a minor increase in  
 311 MIC for carbapenems and cephalosporins (Tables 2 and S4), with a lesser impact from  
 312 OmpK36GD mutations, consistent with an important role for OmpK36 in the nutritious  
 313 growth media (MHB) normally used for standardised MIC determinations (Tables 2 and S4).

**Table 2** Antibiotic MICs *K. pneumoniae* ATCC 13883 and porin mutants

| Strain                    | Antibiotics, MIC (mg/L) <sup>a</sup> |                   |     |             |                  |                  |
|---------------------------|--------------------------------------|-------------------|-----|-------------|------------------|------------------|
|                           | ETP                                  | MEM               | CAZ | CTX         | FOX <sup>b</sup> | CEF <sup>b</sup> |
| ATCC 13883                | 0.015                                | 0.03              | 0.5 | 0.06        | 8                | 8                |
| $\Delta$ K35              | 0.03                                 | 0.06              | 1   | 0.125       | <u>16</u>        | 8-16             |
| $\Delta$ K36              | <b>0.0625</b>                        | 0.06              | 1   | <b>0.25</b> | <u>16-32</u>     | <b>32</b>        |
| K36GD                     | 0.03-0.06                            | 0.03-0.06         | 1   | 0.25        | 16-32            | 16-32            |
| $\Delta$ K35 $\Delta$ K36 | <b>1</b>                             | <b>0.125-0.25</b> | 1   | <b>0.5</b>  | <u>64</u>        | <b>64</b>        |
| $\Delta$ K35K36GD         | <b>0.25</b>                          | 0.06              | 1   | <b>0.5</b>  | <u>64</u>        | <b>32-64</b>     |

314 MIC. Minimal Inhibitory Concentration. ETP, Ertapenem ( $S \leq 0.5$ ,  $R > 1$ ). MEM,  
 315 Meropenem ( $S \leq 2$ ,  $R > 8$ ). CAZ, Ceftazidime ( $S \leq 1$ ,  $R > 4$ ). CTX, Cefotaxime ( $S \leq 1$ ,  $R >$   
 316  $2$ ). FOX, Cefoxitin ( $S \leq 8$ ,  $R \geq 32$ ). CEF, Cephalothin ( $S \leq 8$ ,  $R \geq 32$ ).

317 <sup>a</sup>Boldface numbers indicate at least 4-fold increase in MIC. Underlined MICs are non-  
 318 susceptible according to EUCAST [72] or, for FOX and CEF<sup>b</sup> only, CLSI [73] breakpoints.

319  
 320 OmpK35 loss ( $\Delta$ K35 in Tables 2 and S4) has little impact alone but further increases

321 MICs for most antibiotics in the presence of OmpK36 lesions (e.g.  $\Delta$ K35 $\Delta$ K36 and  
 322  $\Delta$ K35 $\Delta$ K36GD). In addition to ertapenem non-susceptibility,  $\Delta$ OmpK35 $\Delta$ OmpK36 and  
 323  $\Delta$ OmpK35OmpK36GD strains are clinically resistant to first (e.g. cephalothin, CEF) and  
 324 second generation cephalosporins/ cephamycins (e.g. cefoxitin, FOX) (Tables 2 and S4).



325 Naturally occurring plasmids from other *K. pneumoniae* strains encoding a common  
 326 ESBL (*bla*<sub>CTX-M-15</sub>) [31], a metallo-carbapenemase (*bla*<sub>IMP-4</sub>) [32] and a serine-carbapenemase  
 327 (*bla*<sub>KPC-2</sub>) [33] were transferred into ATCC 13883 and its isogenic mutants by conjugation,  
 328 with transfer verified by PCR (Table S1) and S1/PFGE (Fig. S1). Even the common ESBL  
 329 CTX-M-15 confers reduced susceptibility to ETP in the presence of an OmpK36 deletion or  
 330 inner channel mutation (GD duplication), especially if accompanied by an OmpK35 defect  
 331 (Table 3). Expression of the specialised carbapenemases IMP and KPC from their naturally  
 332 occurring plasmids resulted in greatly increased carbapenem MICs (Table 3), with the double  
 333 porin mutants being highly resistant to all carbapenems tested.

334

**Table 3** Carbapenem MICs against ATCC 13883 and porin mutants with *bla*<sub>CTX-M-15</sub>, *bla*<sub>IMP-4</sub> or *bla*<sub>KPC</sub>

| Strain     | MIC (mg/L) |          |     |           |           |           |            |            |            |
|------------|------------|----------|-----|-----------|-----------|-----------|------------|------------|------------|
|            | CTX-M-15   |          |     | IMP-4     |           |           | KPC        |            |            |
|            | ETP        | MEM      | IPM | ETP       | MEM       | IPM       | ETP        | MEM        | IPM        |
| ATCC 13883 | 0.25       | 0.125    | 1   | <u>8</u>  | <u>8</u>  | <u>4</u>  | <u>16</u>  | <u>8</u>   | <u>8</u>   |
| ΔK35       | 0.5        | 0.125    | 1   | <u>8</u>  | <u>8</u>  | <u>4</u>  | <u>32</u>  | <b>32</b>  | <u>16</u>  |
| ΔK36       | <b>1</b>   | 0.25     | 1   | <u>8</u>  | <u>8</u>  | <u>4</u>  | <u>32</u>  | <b>32</b>  | <b>32</b>  |
| K36GD      | <u>1</u>   | 0.25     | 1   | <u>8</u>  | <u>8</u>  | <u>4</u>  | <u>32</u>  | <u>16</u>  | <u>16</u>  |
| ΔK35ΔK36   | <b>8</b>   | <b>2</b> | 1   | <b>64</b> | <b>32</b> | <b>64</b> | <b>128</b> | <b>128</b> | <b>128</b> |
| ΔK35K36GD  | <b>4</b>   | <b>1</b> | 1   | <b>32</b> | <b>32</b> | <b>16</b> | <b>128</b> | <b>128</b> | <b>64</b>  |

335 MIC. Minimal Inhibitory Concentration. ETP, Ertapenem (S ≤ 0.5, R > 1). MEM,  
 336 Meropenem (S ≤ 2, R > 8). IPM, Imipenem (S ≤ 2, R > 8).

337 <sup>a</sup>Boldface numbers indicate at least 4-fold increase between the MICs of the parental strain  
 338 (*K. pneumoniae* ATCC 13883) and the porin mutants. The underlined numbers mean  
 339 intermediate or resistant based on EUCAST breakpoints [72].

340

341 **Altered expression of other common porins in ΔOmpK35, ΔOmpK36, and OmpK36GD.**

342 Other porins may compensate for the loss of major outer membrane porins in *K.*  
 343 *pneumoniae* [74-77]. Expression of *ompK35*, *ompK36*, *ompK37*, *phoE*, *ompK26* and *lamB*  
 344 was measured in isogenic porin mutants of ATCC 13883 and 10.85 *K. pneumoniae* strains, in

345 conditions in which either OmpK35 or OmpK36 are ordinarily expressed (Fig 1. Table S5).  
346 Neither the introduction of a GD duplication into the OmpK36 inner channel (OmpK36GD)  
347 nor the loss of OmpK35 ( $\Delta$ OmpK35 and  $\Delta$ OmpK35OmpK36GD) affected expression of  
348 OmpK36 in MH broth. Loss of OmpK36, however, was associated with increased OmpK35  
349 expression in MH broth, in which OmpK36, but not OmpK35, is ordinarily expressed. Loss  
350 of both of these major porins ( $\Delta$ OmpK35 $\Delta$ OmpK36) resulted in increased expression of  
351 *phoE* and *lamB*. (Fig 1. Table S5).

### 352 **Relative fitness costs of major porin lesions**

353 Exponential phase growth in MH broth was not greatly affected unless both major  
354 porins were absent ( $\Delta$ OmpK35 $\Delta$ OmpK36, Table S6) but competition experiments clearly  
355 illustrate the importance of OmpK36 (Figs 2 and S2). The ability of  $\Delta$ OmpK35 strains to  
356 directly compete against their intact isogenic parents in MH broth was little affected over 7  
357 days growth (Figs S2A1, S2A3 and S2A4) but OmpK36GD strains are clearly much more  
358 able than  $\Delta$ OmpK36 strains to compete with their isogenic parent strains (Figs 2A1 and 2A3).  
359 For ATCC 13883, at day 3, the OmpK36GD population was still 40% of the total combined  
360 population (Fig. 2A1), while  $\Delta$ OmpK36 fell to 20% in the same period (Fig S2B1). This  
361 difference was more marked in the presence of an OmpK35 lesion, but  
362  $\Delta$ OmpK35OmpK36GD populations were still clearly more able than  $\Delta$ OmpK35 $\Delta$ OmpK36 to  
363 compete with the intact parent strain (Figs 2B1, 2B3 versus Figs S2C1 and S2C3). Directly  
364 competing OmpK36GD with  $\Delta$ OmpK36 (and  $\Delta$ OmpK35OmpK36GD with  
365  $\Delta$ OmpK35 $\Delta$ OmpK36) further illustrates the competitive advantage, with OmpK36GD strains  
366 quickly displacing isogenic  $\Delta$ OmpK36 strains in MH broth (Figs 2C1 and 2D1). In fact, the  
367 introduction of an OmpK36GD mutation had no detectable cost at all in *K. pneumoniae* 10.85  
368 (Figs 2A3 and 2B3), with  $\Delta$ OmpK35OmpK36GD competing very successfully against the

369 isogenic parent 10.85 (Fig 2B3: 37±4% and 26±15% of the total population represented by  
370  $\Delta$ OmpK35OmpK36GD on days 6 and 7 respectively)

371 Mouse gut colonizing studies yielded similar results (Figs 2A2 to 2D2 and S2A2 to  
372 S2C2). Mice were confirmed not to include indigenous *K. pneumoniae* on arrival [50], and  
373 stable colonisation at  $\sim 10^9$  CFU/g faeces was achieved (Fig S3). OmpK35 deficient mutants  
374 ( $\Delta$ OmpK35) were not significantly disadvantaged (Fig S2A2) and OmpK36GD strains  
375 strongly outperformed OmpK36 strains in competition with their isogenic parents (Figs 2A2  
376 and S2B2). Similarly, direct *in vivo* competition confirmed a clear fitness advantage of  
377 OmpK36GD over  $\Delta$ OmpK36 (Figs 2C2 and 2D2).

### 378 **Pathogenicity is attenuated in $\Delta$ OmpK36 but not OmpK36GD or $\Delta$ OmpK35 strains**

379 We confirmed the loss of virulence previously ascribed to loss of OmpK36 [78, 79] in  
380 a mouse pneumonia model [51-53] and, importantly, showed no difference in lethality  
381 between a wild type strain and its isogenic mutant  $\Delta$ OmpK35/OmpK36GD (Fig 3). Intranasal  
382 inoculation of mice showed that these mutations had no significant impact on virulence, with  
383 equivalent mortality curves (Figs 3A1 and 3A2) and similar viable counts developing in lung,  
384 blood and spleen over the course of infection in isogenic pairs derived from both the ATCC  
385 strain and the clinical isolate 10.85 (Figs 3B to 3D).

### 386 **Structural impacts of OmpK36 loop L3 mutations**

387 Two crystal structures of native OmpK36 available in the Protein Data Bank under  
388 accession number 5nup (2.9 Å, Xray) and 1osm (3.2 Å, Xray) were evaluated as template for  
389 structural modelling of OmpK36 and OmpK36GD from ATCC 13883, with targets and  
390 templates sharing around 93% nucleotide sequence identity. While Ramachandran plots  
391 analysis for all predicted models show at least 98% of residues in allowed regions, other  
392 metrics such as QMEAN and Molprobit score are marginally better for ATCC13883

393 OmpK36 and OmpK36GD models based on the 5nup structure (Fig. 4, Table S7). Although  
394 several differences can be observed in the final alignment (Fig 4D), the most prominent  
395 differences between the original structure (Fig. 4A) and the ATCC13883 OmpK36 model lie  
396 within the loop L6, which can be seen in yellow, slightly obstructing the outmost channel of  
397 the porin (Fig. 4B). More striking is the impact of single di-nucleotide -GD insertion with in  
398 loop L3, which is expected to constrict even more the porin channel (Fig. 4C) and is likely  
399 responsible for the difference of phenotype between the 2 variants.

#### 400 **OmpK35 loss and convergent evolution of OmpK36GD**

401 The successful antibiotic resistance, colonisation and pathogenicity phenotypes of  
402  $\Delta$ OmpK35OmpK36GD strains should be reflected in their representation among strains  
403 causing human infection. Of 165 unique *K. pneumoniae ompK36* sequences in GenBank,  
404 16% varied from the consensus L3 inner channel motif (PEFGGD). Most common was the  
405 GD duplication (PEFGGD**GD**, in 14 of 26 OmpK36 L3 variants identified), along with 6  
406 additional variants: PEFGG**DD**, PEFGG**DSD**, PEFGG**DTD**, PEFGG**DTYD**, PEFGG**DTYG**  
407 and PEFGG**DTYGSD** (Fig. S4). Inspection of their corresponding nucleotide sequences  
408 suggests that these variants originated from various combinations of short in-frame  
409 duplications, combined with additional point mutations in rare cases (Fig. S5).

410 To investigate OmpK36 among clinical isolates without specialised carbapenemases,  
411 we specifically analysed L3 variation in all such *K. pneumoniae* isolates with an Ertapenem  
412 MIC > 1 in our local clinical collection (Table 1) by PCR and sequencing (Table S1). Of  
413 (n=51), 17 strains (33 %) were identified: all revealed either the previously described GD or  
414 TD mutation in the L3 loop of *ompK36* on sequencing and these encoded up to 6 distinct  
415 beta-lactamases. These isolates were genetically diverse but belonged to major epidemic  
416 clones found elsewhere in the world: *i.e.* ST14, ST16, ST101, ST147, with as many as 6

417 distinct *ompK35* mutations, all of which introduced disrupting frame-shifts and all of which  
418 were relatively lineage-specific (Fig S6).

419 Finally, all *K. pneumoniae* (complete and draft) genomes available from Genbank, *i.e.*  
420 1,557 entries (as of February 2017) were examined: the two common (GD and TD) variants  
421 are shown in a minimum spanning tree built using MLST profiles (Fig. 5) to be distributed  
422 across the whole spectrum of diversity of *K. pneumoniae*, including in most major epidemic  
423 clones, *e.g.* ST258 and its derivative ST512, ST11, ST101, ST147, ST14 and ST37.

424 A maximum likelihood phylogeny using a 2,253,033 bp core genome alignment of all  
425 1,557 genomes was computed to contextualize variations in *ompK36* and *ompK35*, with  
426 metadata relative to the population (year, source, geographical regions of isolation, as well as  
427 major beta-lactamases genes) (Fig. 6). Those genes most relevant to a carbapenem resistance  
428 phenotype are shown, and the expected clustering of some of these is as expected (*e.g.*  
429 *bla*<sub>CTX-M-15</sub> with *OXA-1* and *TEM-1b*). Major associations with other genes not affected by porin  
430 changes are not shown (*e.g.* aminoglycoside resistance due to 16S methylase genes that are  
431 common companions of *bla*<sub>NDM</sub>, other class I integron cassettes from the array in which  
432 *bla*<sub>IMP-4</sub> is found, etc). The predominance of *ompK36* variations in L3 compared to its loss or  
433 disruption is evident at a glance, as is the common loss or disruption of *ompK35* in unrelated  
434 strains. There is no obvious relationship between *OmpK36* L3 variations and the presence of  
435 *bla*<sub>KPC</sub> but there is strong clustering of these variations in certain types (ST 258, 512 etc).

436 We attempted to take sampling bias into consideration by adjusting for the  
437 distribution of samples according to metrics such as ST, country, and year (Fig S7). As  
438 expected for a gene so clearly linked to fitness and virulence, *ompK36* is highly conserved  
439 across the population (present in 1,499 out of 1,577), independent of ST (Chisq = 207.51, df  
440 = 227, p-value = 0.8188), while *ompK35* (evidently dispensable in the host) is disrupted in

441 nearly a third of all strains (Fig. 6), and particularly within the major epidemic clone ST258  
442 (Chisq = 603.7, df = 227, p-value = 5.748e-36). Three-way comparison of the  
443 presence/absence of *ompK35*, mutations in *ompK36*, and ST (considering only those STs  
444 harbouring *ompK36* GD/TD variants) shows that i) some STs tend to have both *ompK36* and  
445 *ompK35* intact (mainly ST15, ST16, ST17); ii) others tend to have intact *ompK36* with  
446 disrupted *ompK35* (ST101, ST129, ST258); and iii) some STs tend to have *ompK36* (GD/TD)  
447 variants combined with disrupted *ompK35* (ST11, ST14, ST147, ST258 and ST37) (Fig. S8).  
448 Associations between presence/absence of OmpK35, an extra aspartate in OmpK36 loop 3  
449 and other metrics such as year or country of isolation may be confounded by over-  
450 representation of certain categories (USA, years 2011 and 2014) and we were unable to  
451 identify a definite temporal or geographical signal (Fig. S9 and S10).

452 Finally, we looked at associations between the number of resistance genes and porin  
453 defects in major STs, and found that the presence of *ompK36* GD/TD variants did not  
454 correlate with a higher number of resistance genes (with the exception of OmpK36GD in  
455 ST14). In fact, successful clones such as ST258 and ST11 harbouring OmpK36GD encoded  
456 significantly less resistance genes ( $p < 0.001$ , Wilcoxon test) (Fig. S11).

## 457 Discussion

458  $\beta$ -lactam antibiotics are among the most commonly prescribed for severe infections  
459 [80, 81] and the emergence of  $\beta$ -lactam resistance in *K. pneumoniae* has become a global  
460 health threat [82, 83]. In general, *E. coli* and *K. pneumoniae* carrying transmissible  $\beta$ -lactam  
461 resistance genes have predictable and normally distributed  $\beta$ -lactam MICs [21] but  
462 carbapenem MICs in *K. pneumoniae* are bimodally distributed with higher MICs correlating

463 with OmpK36 defects [21]. OmpK36 loss or mutation is not uncommonly reported in highly  
464 resistant clinical isolates producing KPC, ESBL or AmpC  $\beta$ -lactamases [20, 84, 85].

465 Diffusion of  $\beta$ -lactam antibiotics through non-specific porins such as OmpK35 and  
466 OmpK36 is dependent on size, charge and hydrophobicity [86, 87], with bulky negatively  
467 charged compounds diffusing at a lower rate than small zwitterions of the same molecular  
468 weight [88]. OmpK35 is much less expressed in high osmolarity nutrient-rich conditions than  
469 OmpK36, which has the narrower porin channel of the two (Fig S12) [9] and large negatively  
470 charged  $\beta$ -lactams such as third-generation cephalosporins and carbapenems diffuse more  
471 efficiently through OmpK35 than OmpK36 [78, 89]. Here we confirm the significantly  
472 increased MICs, commonly attributed to mutations in these two major porins [10, 90, 91], in  
473 three *K. pneumoniae* strains (the widely-published ATCC strain 13883 and two locally  
474 isolated clinical strains (Tables 2 and S4); and unequivocally identify the primary role of  
475 OmpK36 in carbapenem resistance.

476 Comparable MIC changes in single (OmpK36GD and  $\Delta$ OmpK36) and double  
477 ( $\Delta$ OmpK35OmpK36GD and  $\Delta$ OmpK35 $\Delta$ OmpK36) mutants indicate that duplication of a  
478 glycine aspartate (GD) pair in a critical position in the porin eyelet region (loop 3) is almost  
479 as effective as a complete deletion of the porin in excluding large anionic antibiotics. Both  
480 single and double porin mutants were susceptible to extended-spectrum cephalosporins  
481 (cefotaxime and ceftazidime) in the absence of acquired hydrolysing enzymes, demonstrating  
482 the impotence of the naturally occurring chromosomal SHV [68-70] against these compounds  
483 [90].

484 Differences relating to porin permeability in *K pneumoniae* are most striking and  
485 important in the presence of acquired carbapenemases and it is clear that these permeability  
486 changes greatly enhance the associated resistance phenotypes. The common Ambler Class A

487 serine protease KPC-2 and Class B metalloenzyme IMP-4 expressed from their natural  
488 plasmids produce only borderline resistance against meropenem and the smaller zwitterionic  
489 imipenem in the presence of the ‘wild type’ OmpK36 osmoporin (Table 3) but MICs that  
490 exceed therapeutic tissue levels [92, 93] are the rule in strains of the commonly occurring  
491  $\Delta$ OmpK35OmpK36GD genotype.

492 We also show here that the OmpK35 matrix porin has little or no relevance *in vivo* or  
493 in test conditions that reliably predict antibiotic efficacy in the clinic (MICs and competitive  
494 fitness in Mueller-Hinton broth). Consistent with this, a high percentage of clinical isolates  
495 whose genomes have been lodged with GenBank appear to have lost their ability to express  
496 OmpK35 altogether (Fig 6). Increased production of the larger channel OmpK35 is expected  
497 under low-temperature, low-osmolarity and low nutrient conditions (Fig S12). These favour  
498 survival outside the mammalian host and we show that  $\Delta$ OmpK35 strains fail to compete  
499 successfully with their isogenic parents in nutrient-limited conditions (Fig. S13). We confirm  
500 that OmpK35 is not naturally expressed at significant levels in optimal growth conditions nor  
501 in the mammalian host, as previously described [76, 78] and competition experiments, the  
502 most sensitive and direct measures of comparative fitness, evince no discernible disadvantage  
503 from the loss of OmpK35 *in vivo*, as expected [19, 94].

504 Loss of OmpK36 trades off nutrient influx for antibiotic resistance [41, 78] and we  
505 show that these more resistant bacteria cannot compete successfully with the antibiotic-  
506 susceptible populations from which they arise once antibiotic selection ceases to operate (Fig  
507 S2). Double porin mutants ( $\Delta$ OmpK35 $\Delta$ OmpK36) are the most antibiotic-resistant (Tables 2  
508 and S4) but this resistance comes at the cost of a 10% relative growth reduction in nutritious  
509 media (Table S6). We show that loss of OmpK36, the main porin normally expressed *in vivo*,  
510 is responsible for most of this fitness cost (Figs 2 and S2). The less permeable phosphoporin



511 PhoE and maltodextrin channel LamB are most important in the usual compensatory response  
512 when OmpK35 is not available but are not very efficient substitutes (Fig 1 and Table S5).  
513 Defects in these porins have been implicated in carbapenem resistance in association with  
514 only an AmpC-type enzyme [41, 74, 77, 95] but the fitness cost may be too high for long-  
515 term success as such strains are rarely described. By contrast,  $\Delta$ OmpK35OmpK36GD  
516 mutants exhibit little disadvantage compared to isogenic parents with both porins intact, *in*  
517 *vivo* or in optimal growth conditions *in vitro* (Fig 2, Table S6). Expression of OmpK36 is  
518 unaffected (Fig 1 and Table S5) as is that of other porins such as OmpK35 (Fig 1 and Table  
519 S5), presumably because OmpK36 ‘rescue’ is not required.

520 The precise loop 3 variation in OmpK36 is evidently a convergent evolutionary  
521 process, as a range of different variants occur within genetically distant *K. pneumoniae*  
522 populations, all having in common the presentation of an extra negatively charged aspartate  
523 (D) residue that significantly constricts the inner channel (Figure 4). The most common  
524 solution is the extra glycine and aspartate (PEFGGD to PEFGGDGD in the critical region)  
525 which we recreated in isogenic mutants for our experiments. The next most frequent, an extra  
526 TD (rather than GD), is similarly likely to spontaneously arise (Fig S5) but is much less  
527 common, including in STs in which both GD and TD are found (Figs 5 and 6), implying a  
528 less optimal conformation. A recent survey of nearly 500 ertapenem-resistant *Klebsiellae*  
529 lacking specialised carbapenemases [96] supports our own finding of the extra aspartate in  
530 that position, most commonly as a GD pair, with TD and SD much less often, and other  
531 variants being quite rare (Fig. S14). We found no examples of a similarly acidic (glutamate)  
532 residue naturally occurring in this position, perhaps reflecting the fact that even simple  
533 sequence changes (here, GAY to GAR) add an additional step to a simple duplication event,  
534 or the fact that glutamate’s extra carbon makes it slightly less compact than an aspartate in  
535 this position.

536 Other Enterobacteria face the same challenge of excluding bulky anionic carbapenem  
537 antibiotics in order to survive high concentrations, even in the presence of a specialist  
538 carbapenemase. High level antimicrobial resistance has been ascribed to similar variations in  
539 L3 of OmpK36 homologues in *Enterobacter aerogenes*, *Escherichia coli* and *Neisseria*  
540 *gonorrhoeae* (Fig S15) [97-101]. In comparison with their *E. coli* homologues (OmpF and  
541 OmpC), OmpK35 and OmpK36 permit greater diffusion of  $\beta$ -lactams [102]. Specifically,  
542 OmpK35 appears to be highly permeable to third-generation cephalosporins such as  
543 cefotaxime due to its particular L3 domain, which is also seen in Omp35 in *E. aerogenes* but  
544 not in other species, and has been proposed as an explanation for the high proportion of *K.*  
545 *pneumoniae* clinical isolates that lack this porin [102, 103]. Our findings of increased MICs  
546 in OmpK35 mutants are consistent with those of others [102] but we show here that the more  
547 permeable OmpK35 is not important in the mammalian host. Rather, the much less  
548 permeable OmpK36 (equivalent to *E. coli* OmpC) [102] is the bottleneck for large anionic  
549 antibiotics.

550 The term ‘high risk clone’ [104, 105] is given to host-adapted/ pathogenic strains that  
551 dominate the epidemiology of (antibiotic resistant) infections, presumably because they are  
552 more transmissible, more pathogenic and/or more tolerant of host-associated stresses  
553 (including antibiotics). Here, we see a range of unrelated clonal groups already identifiable as  
554 high-risk clones that are dispensing with the OmpK35 porin (Fig 6). The minimal antibiotic  
555 resistance advantage in nutritious media is only evident with carbapenems and is unlikely to  
556 arise in the presence of an existing OmpK36 loss mutation because the fitness cost is  
557 substantial. The loss of OmpK35 through low-level carbapenem exposure in environmental  
558 conditions is possible [106] but also has a marked fitness cost and the exposure to  
559 carbapenems in the environment is expected to be limited, as they are a still a minority class

560 of prescribed antibiotics and are not yet as common in environmental waters as the  
561 sulfonamides, quinolones, macrolides, tetracyclines and other beta-lactams [107].

562         A recent review of antibiotic resistance in *Klebsiella* pointed out that “The exact role  
563 of porins in antimicrobial resistance is difficult to determine because other mechanisms...are  
564 commonly present...” [108]. We suggest that host-adaptation in *K. pneumoniae* is widespread  
565 and that many *K. pneumoniae* have dispensed with the OmpK35 matrix porin required for an  
566 environmental life cycle. Under a major stress (as antibiotic pressure or high concentrations  
567 of bile salts in the intestinal lumen), bacteria try to adapt to the new environment [109]. It has  
568 been described that for *E. coli*, toxic agents as antibiotics and bile acids diffuse better through  
569 the larger OmpF channel (homolog of OmpK35) than the narrower OmpC (equivalent to  
570 OmpK36 in *K. pneumoniae*) [110]. At the same time, high osmolarity, high temperature, low  
571 pH and anaerobiosis (typical conditions in gut environment) induce the production of  
572 OmpK36 but inhibit the expression of *ompK35* [111] [112] [113]. Interestingly, *E. coli*  
573 mutants with reduced permeability (decreased *ompF* and increased *ompC* mRNA and protein  
574 levels compared with parental strain) can be easily recovered from intestinal gut of germ-free  
575 mice after few days of colonization [114]. Convergent evolution upon a highly specific  
576 variation in the inner channel of the osmoporin OmpK36 efficiently solves the problem of  
577 carbapenem resistance at no cost to colonising ability, competitiveness or pathogenicity and  
578 can be expected to be an increasingly common feature of host-adapted ‘high-risk clones’.

579         There are three direct and immediate implications. Firstly, efforts to control the spread  
580 of such strains will be facilitated to some extent by the loss of environmental hardiness  
581 resulting from OmpK35 deletion, and should shift slightly more toward managing  
582 interpersonal transmission. Secondly, *K. pneumoniae* can be expected to become more  
583 antibiotic resistant overall and organisms expressing currently circulating plasmid-borne  
584 carbapenemases will more commonly be untreatable with carbapenem antibiotics (e.g. ST258

585 strains with *bla*<sub>KPC</sub>); the second (higher MIC) peak in the bimodal distribution of carbapenem  
586 MICs in *K. pneumoniae* populations will become more prominent. Finally, the mobile  
587 carbapenemase gene pool can be expected to flourish in the protected niche provided by host-  
588 adapted *K. pneumoniae* populations under strong carbapenem selection pressure in human  
589 hosts, thereby increasing the general availability of highly transmissible carbapenem  
590 resistance plasmids among host-adapted pathogens in the *Enterobacteriaceae*.

## 591 **Figures**

### 592 **Figure 1: Real-time RT-PCR in *K. pneumoniae* ATCC 13883 and 10.85 porin mutants.**

593 The expression of *rpoD* was used to normalize the results. The levels of expression of each  
594 mutant are shown relative to the wild type strain ATCC 13883 or 10.85.

### 595 **Figure 2: *In vitro* and *in vivo* competition experiments in *K. pneumoniae* ATCC 13883 596 and 10.85 OmpK36GD porin mutants.**

597 The relative fitness of OmpK36GD porin mutants  
598 in comparison with parental strain (ATCC 13883 or 10.85) or versus  $\Delta$ OmpK36 mutant was  
599 performed by competition experiments in co-cultures and expressed as a percentage of the  
600 mutant or wild type cells versus total population at each time point. *In vitro* growth  
601 conditions, MH broth, 37°C. Panels 1 and 3 represent *in vitro* competition experiments for  
602 ATCC 13883 and 10.85, respectively. Panels in row 2 show *in vivo* competition experiments  
603 for ATCC 13883. For *in vivo* competition experiments, the values for each mouse are  
604 represented individually. Violet diamond, ATCC 13883 or 10.85 wild type strains. Green  
605 square, OmpK36GD mutant. Pink circle,  $\Delta$ OmpK35OmpK36GD mutant. Red square,  
606  $\Delta$ OmpK36 mutant. Blue circle,  $\Delta$ OmpK35 $\Delta$ OmpK36 mutant.

### 606 **Figure 3: Lung infection experiments in *K. pneumoniae* ATCC 13883 and 10.85 and 607 their isogenic porin mutants $\Delta$ OpmK35/OmpK36GD.**

608 Survival curves after intranasal  
609 infection are represented in panels A1 (for ATCC 13883) and A2 (for 10.85). Organ burden  
610 after 24, 48 or 72h is represented in panels B1 to D1 for ATCC 13883 and B2 to D2 for  
611 10.85. Violet diamond, ATCC 13883 or 10.85 wild type strains. Pink circle,  
612  $\Delta$ OmpK35OmpK36GD mutant.

612 **Figure 4: Channel restriction of OmpK36 variants.** Comparison of the reference OmpK36  
613 structure under PDB accession 5nupA (A) against predicted structural models of OmpK36  
614 (B) and OmpK36GD mutant (C) from ATCC 13883, showing progressive restriction of the  
615 porin channel. The conformation visualised in panel B, in particular the loop 6 in yellow,  
616 which can be seen partially obstructing the channel, is not associated with a carbapenem  
617 resistance phenotype, contrary to the GD mutant shown in panel C. Panel D consists of the  
618 multiple alignment of the 3 corresponding sequences, along with a representation of the  
619 predicted secondary structures designated as follows; B for barrel, T for turn, and L for loop.  
620 Single peptide is not shown in 5nupA sequence (Panel D).

621 **Figure 5: Minimum spanning tree of 1,557 *K. pneumoniae* strains based on their MLST**  
622 **profile.** Each circle corresponds to a distinct ST, with its size being proportional to the  
623 number of strains of that particular ST (for scale, ST258 contains 552 isolates). Within an ST,  
624 the proportion of strains harbouring either a GD or TD insertion in the loop L3 of *ompK36* is  
625 shown as a sector coloured in red and pink, respectively. STs carrying these mutations are  
626 also circled in grey.

627 **Figure 6: Maximum likelihood tree of 1,557 *K. pneumoniae* strains.** A phylogenetic tree  
628 was built using a 2,253,033 bp long core alignment. Contextual information relative the  
629 collection was visualized using Phandango and includes ST (of which the major ones are  
630 indicated on the tree); GD or TD insertion in the loop L3 of *ompK36*, in black and red,  
631 respectively; presence or absence of *ompK36*, in orange and purple, respectively; presence or  
632 absence of *ompK35*, in orange and purple, respectively. Additional metadata include year of  
633 isolation, in a gradient from purple to yellow; source and geographical region of isolation in a  
634 rainbow gradient; and presence of major beta-lactamases (bla) alleles identified, in dark blue.

## 635 **References**

- 636 **1. Podschun R, Ullmann U. *Klebsiella* spp. as nosocomial pathogens: epidemiology,**  
637 **taxonomy, typing methods, and pathogenicity factors. *Clinical microbiology reviews.***  
638 **1998;11(4):589-603.**
- 639 **2. Canton R, Coque TM. The CTX-M  $\beta$ -lactamase pandemic. *Current opinion in*  
640 **microbiology. 2006;9(5):466-75.****
- 641 **3. Jacoby GA. AmpC  $\beta$ -lactamases. *Clinical microbiology reviews.* 2009;22(1):161-  
642 **82.****
- 643 **4. Nordmann P, Dortet L, Poirel L. Carbapenem resistance in *Enterobacteriaceae*:**  
644 **here is the storm! *Trends in molecular medicine.* 2012;18(5):263-72.**
- 645 **5. Nordmann P, Naas T, Poirel L. Global spread of carbapenemase-producing**  
646 ***Enterobacteriaceae*. *Emerging infectious diseases.* 2011;17(10):1791-8.**
- 647 **6. Padilla E, Alonso D, Domenech-Sanchez A, Gomez C, Perez JL, Alberti S, et al.**  
648 **Effect of porins and plasmid-mediated AmpC  $\beta$ -lactamases on the efficacy of  $\beta$ -lactams**  
649 **in rat pneumonia caused by *Klebsiella pneumoniae*. *Antimicrobial agents and***  
650 **chemotherapy. 2006;50(6):2258-60.**

- 651 7. Agyekum A, Fajardo-Lubian A, Ai X, Ginn AN, Zong Z, Guo X, et al.  
652 Predictability of phenotype in relation to common  $\beta$ -lactam resistance mechanisms in  
653 *Escherichia coli* and *Klebsiella pneumoniae*. *Journal of clinical microbiology*.  
654 2016;54(5):1243-50.
- 655 8. Alberti S, Rodriguez-Quinones F, Schirmer T, Rummel G, Tomas JM,  
656 Rosenbusch JP, et al. A porin from *Klebsiella pneumoniae*: sequence homology, three-  
657 dimensional model, and complement binding. *Infection and immunity*. 1995;63(3):903-  
658 10.
- 659 9. Hernández-Allés S, Albertí S, Alvarez D, Doménech-Sánchez A, Martínez-  
660 Martínez L, Gil J, et al. Porin expression in clinical isolates of *Klebsiella pneumoniae*.  
661 *Microbiology*. 1999;145:673-9.
- 662 10. Domenech-Sánchez A, Pascual A, Suarez AI, Alvarez D, Benedí VJ, Martínez-  
663 Martínez L. Activity of nine antimicrobial agents against clinical isolates of *Klebsiella*  
664 *pneumoniae* producing extended-spectrum  $\beta$ -lactamases and deficient or not in porins.  
665 *The Journal of antimicrobial chemotherapy*. 2000;46(5):858-9.
- 666 11. Andersson DI, Levin BR. The biological cost of antibiotic resistance. *Current*  
667 *opinion in microbiology*. 1999;2(5):489-93.
- 668 12. Guo B, Abdelraouf K, Ledesma KR, Nikolaou M, Tam VH. Predicting bacterial  
669 fitness cost associated with drug resistance. *The Journal of antimicrobial chemotherapy*.  
670 2012;67(4):928-32.



- 671 13. Marcusson LL, Frimodt-Møller N, Hughes D. Interplay in the selection of  
672 fluoroquinolone resistance and bacterial fitness. *PLoS Pathog.* 2009;5(8):e1000541.
- 673 14. Choi MJ, Ko KS. Loss of hypermucoviscosity and increased fitness cost in  
674 colistin-resistant *Klebsiella pneumoniae* sequence type 23 strains. *Antimicrobial agents*  
675 *and chemotherapy.* 2015;59(11):6763-73.
- 676 15. Pagès JM, James CE, Winterhalter M. The porin and the permeating antibiotic:  
677 a selective diffusion barrier in Gram-negative bacteria. *Nature reviews Microbiology.*  
678 2008;6(12):893-903.
- 679 16. King T, Ishihama A, Kori A, Ferenci T. A regulatory trade-off as a source of  
680 strain variation in the species *Escherichia coli*. *Journal of bacteriology.*  
681 2004;186(17):5614-20.
- 682 17. Ferenci T. Maintaining a healthy SPANC balance through regulatory and  
683 mutational adaptation. *Molecular microbiology.* 2005;57(1):1-8.
- 684 18. Ferenci T, Phan K. How porin heterogeneity and trade-offs affect the antibiotic  
685 susceptibility of Gram-negative bacteria. *Genes (Basel).* 2015;6(4):1113-24.
- 686 19. Andersson DI, Hughes D. Antibiotic resistance and its cost: is it possible to  
687 reverse resistance? *Nature reviews Microbiology.* 2010;8(4):260-71.

- 688 **20. Crowley B, Benedi VJ, Domenech-Sanchez A. Expression of SHV-2  $\beta$ -lactamase**  
689 **and of reduced amounts of OmpK36 porin in *Klebsiella pneumoniae* results in increased**  
690 **resistance to cephalosporins and carbapenems. *Antimicrobial agents and***  
691 **chemotherapy. 2002;46(11):3679-82.**
- 692 **21. Agyekum A, Fajardo-Lubi A, Xiaoman A, Ginn AN, Zong Z, Guo X, et al.**  
693 **Predictability of phenotype in relation to common beta-lactam resistance mechanisms in**  
694 ***Escherichia coli* and *Klebsiella pneumoniae*. *Journal of clinical microbiology*. 2016.**
- 695 **22. Woodcock DM, Crowther PJ, Doherty J, Jefferson S, DeCruz E, Noyer-Weidner**  
696 **M, et al. Quantitative evaluation of *Escherichia coli* host strains for tolerance to cytosine**  
697 **methylation in plasmid and phage recombinants. *Nucleic acids research*.**  
698 **1989;17(9):3469-78.**
- 699 **23. Crepin S, Harel J, Dozois CM. Chromosomal complementation using Tn7**  
700 **transposon vectors in *Enterobacteriaceae*. *Applied and environmental microbiology*.**  
701 **2012;78(17):6001-8.**
- 702 **24. Ogunniyi AD, Kotlarski I, Morona R, Manning PA. Role of SefA subunit protein**  
703 **of SEF14 fimbriae in the pathogenesis of *Salmonella enterica* serovar Enteritidis.**  
704 ***Infection and immunity*. 1997;65(2):708-17.**
- 705 **25. Datsenko KA, Wanner BL. One-step inactivation of chromosomal genes in**  
706 ***Escherichia coli* K-12 using PCR products. *Proc Natl Acad Sci U S A*. 2000;97(12):6640-**  
707 **5.**

- 708 **26. Murphy KC, Campellone KG. Lambda Red-mediated recombinogenic**  
709 **engineering of enterohemorrhagic and enteropathogenic *E. coli*. BMC Mol Biol.**  
710 **2003;4:11.**
- 711 **27. CLSI. Methods for dilution antimicrobial susceptibility tests for bacteria that**  
712 **grow aerobically. 9th edition ed: Clinical Laboratory Standards Institute, Wayne, PA;**  
713 **2012.**
- 714 **28. EUCAST. Breakpoint tables for the interpretation of MICs and zone diameters:**  
715 **European Committee on Antimicrobial Susceptibility Testing, Växjö, Sweden; 2015.**
- 716 **29. CLSI. Performance standards for antimicrobial susceptibility testing; Twenty-**  
717 **fourth informational supplement 2014.**
- 718 **30. Valenzuela JK, Thomas L, Partridge SR, van der Reijden T, Dijkshoorn L,**  
719 **Iredell J. Horizontal gene transfer in a polyclonal outbreak of carbapenem-resistant**  
720 ***Acinetobacter baumannii*. Journal of clinical microbiology. 2007;45(2):453-60.**
- 721 **31. Partridge SR, Ellem JA, Tetu SG, Zong Z, Paulsen IT, Iredell JR. Complete**  
722 **sequence of pJIE143, a pir-type plasmid carrying *ISEcp1-bla*<sub>CTX-M-15</sub> from an**  
723 ***Escherichia coli* ST131 isolate. Antimicrobial agents and chemotherapy.**  
724 **2011;55(12):5933-5.**

- 725 **32. Partridge SR, Ginn AN, Paulsen IT, Iredell JR. pEI1573 carrying *bla*<sub>IMP-4</sub> from**  
726 **Sydney, Australia, is closely related to other IncL/M plasmids. Antimicrobial agents**  
727 **and chemotherapy. 2012;56(11):6029-32.**
- 728 **33. Partridge SR, Ginn AN, Wiklendt AM, Ellem J, Wong JS, Ingram P, et al.**  
729 **Emergence of *bla*<sub>KPC</sub> carbapenemase genes in Australia. Int J Antimicrob Agents.**  
730 **2015;45(2):130-6.**
- 731 **34. Zong Z, Partridge SR, Thomas L, Iredell JR. Dominance of *bla*<sub>CTX-M</sub> within an**  
732 **Australian extended-spectrum  $\beta$ -lactamase gene pool. Antimicrobial agents and**  
733 **chemotherapy. 2008;52(11):4198-202.**
- 734 **35. Espedido BA, Partridge SR, Iredell JR. *bla*<sub>IMP-4</sub> in different genetic contexts in**  
735 ***Enterobacteriaceae* isolates from Australia. Antimicrobial agents and chemotherapy.**  
736 **2008;52(8):2984-7.**
- 737 **36. Barton BM, Harding GP, Zuccarelli AJ. A general method for detecting and**  
738 **sizing large plasmids. Analytical biochemistry. 1995;226(2):235-40.**
- 739 **37. Partridge SR, Zong Z, Iredell JR. Recombination in IS26 and Tn2 in the**  
740 **evolution of multiresistance regions carrying *bla*<sub>CTX-M-15</sub> on conjugative IncF plasmids**  
741 **from *Escherichia coli*. Antimicrobial agents and chemotherapy. 2011;55(11):4971-8.**

- 742 **38. Carlone GM, Thomas ML, Rumschlag HS, Sottnek FO. Rapid microprocedure**  
743 **for isolating detergent-insoluble outer membrane proteins from *Haemophilus* species.**  
744 **Journal of clinical microbiology. 1986;24(3):330-2.**
- 745 **39. Rasheed JK, Anderson GJ, Yigit H, Queenan AM, Domenech-Sanchez A,**  
746 **Swenson JM, et al. Characterization of the extended-spectrum  $\beta$ -lactamase reference**  
747 **strain, *Klebsiella pneumoniae* K6 (ATCC 700603), which produces the novel enzyme**  
748 **SHV-18. Antimicrobial agents and chemotherapy. 2000;44(9):2382-8.**
- 749 **40. Livak KJ, Schmittgen TD. Analysis of relative gene expression data using real-**  
750 **time quantitative PCR and the  $2(-\Delta\Delta C(T))$  Method. Methods. 2001;25(4):402-8.**
- 751 **41. Knopp M, Andersson DI. Amelioration of the fitness costs of antibiotic resistance**  
752 **due to reduced outer membrane permeability by upregulation of alternative porins.**  
753 **Molecular biology and evolution. 2015;32(12):3252-63.**
- 754 **42. Olivares J, Alvarez-Ortega C, Linares JF, Rojo F, Kohler T, Martinez JL.**  
755 **Overproduction of the multidrug efflux pump MexEF-OprN does not impair**  
756 ***Pseudomonas aeruginosa* fitness in competition tests, but produces specific changes in**  
757 **bacterial regulatory networks. Environmental microbiology. 2012;14(8):1968-81.**
- 758 **43. Nevola JJ, Stocker BA, Laux DC, Cohen PS. Colonization of the mouse intestine**  
759 **by an avirulent *Salmonella typhimurium* strain and its lipopolysaccharide-defective**  
760 **mutants. Infection and immunity. 1985;50(1):152-9.**

- 761 44. Favre-Bonte S, Licht TR, Forestier C, Krogfelt KA. *Klebsiella pneumoniae*  
762 capsule expression is necessary for colonization of large intestines of streptomycin-  
763 treated mice. *Infection and immunity*. 1999;67(11):6152-6.
- 764 45. Schjørring S, Struve C, Krogfelt KA. Transfer of antimicrobial resistance  
765 plasmids from *Klebsiella pneumoniae* to *Escherichia coli* in the mouse intestine. *The*  
766 *Journal of antimicrobial chemotherapy*. 2008;62(5):1086-93.
- 767 46. Schjørring S, Struve C, Krogfelt KA. Transfer of antimicrobial resistance  
768 plasmids from *Klebsiella pneumoniae* to *Escherichia coli* in the mouse intestine. *The*  
769 *Journal of antimicrobial chemotherapy*. 2008;62(5):1086-93.
- 770 47. Chaves J, Ladona MG, Segura C, Coira A, Reig R, Ampurdanes C. SHV-1 beta-  
771 lactamase is mainly a chromosomally encoded species-specific enzyme in *Klebsiella*  
772 *pneumoniae*. *Antimicrobial agents and chemotherapy*. 2001;45(10):2856-61.
- 773 48. Haeggman S, Lofdahl S, Paauw A, Verhoef J, Brisse S. Diversity and evolution  
774 of the class A chromosomal beta-lactamase gene in *Klebsiella pneumoniae*.  
775 *Antimicrobial agents and chemotherapy*. 2004;48(7):2400-8.
- 776 49. Bush K, Fisher JF. Epidemiological expansion, structural studies, and clinical  
777 challenges of new  $\beta$ -lactamases from Gram-negative bacteria. *Annual review of*  
778 *microbiology*. 2011;65:455-78.

- 779 **50. Tomás JM, Ciurana B, Jofre JT. New, simple medium for selective, differential**  
780 **recovery of *Klebsiella spp.* Applied and environmental microbiology. 1986;51(6):1361-3.**
- 781 **51. Lawlor MS, Hsu J, Rick PD, Miller VL. Identification of *Klebsiella pneumoniae***  
782 **virulence determinants using an intranasal infection model. Molecular microbiology.**  
783 **2005;58(4):1054-73.**
- 784 **52. Struve C, Bojer M, Krogfelt KA. Characterization of *Klebsiella pneumoniae* type**  
785 **1 fimbriae by detection of phase variation during colonization and infection and impact**  
786 **on virulence. Infection and immunity. 2008;76(9):4055-65.**
- 787 **53. Renois F, Jacques J, Guillard T, Moret H, Pluot M, Andreoletti L, et al.**  
788 **Preliminary investigation of a mice model of *Klebsiella pneumoniae subsp. ozaenae***  
789 **induced pneumonia. Microbes and infection. 2011;13(12-13):1045-51.**
- 790 **54. Biasini M, Bienert S, Waterhouse A, Arnold K, Studer G, Schmidt T, et al.**  
791 **SWISS-MODEL: modelling protein tertiary and quaternary structure using**  
792 **evolutionary information. Nucleic acids research. 2014;42(Web Server issue):W252-8.**
- 793 **55. Davis IW, Leaver-Fay A, Chen VB, Block JN, Kapral GJ, Wang X, et al.**  
794 **MolProbity: all-atom contacts and structure validation for proteins and nucleic acids.**  
795 **Nucleic acids research. 2007;35(Web Server issue):W375-83.**

- 796 **56. Chen VB, Arendall WB, 3rd, Headd JJ, Keedy DA, Immormino RM, Kapral GJ,**  
797 **et al. MolProbity: all-atom structure validation for macromolecular crystallography.**  
798 **Acta crystallographica Section D, Biological crystallography. 2010;66(Pt 1):12-21.**
- 799 **57. Bowie JU, Luthy R, Eisenberg D. A method to identify protein sequences that**  
800 **fold into a known three-dimensional structure. Science. 1991;253(5016):164-70.**
- 801 **58. Luthy R, Bowie JU, Eisenberg D. Assessment of protein models with three-**  
802 **dimensional profiles. Nature. 1992;356(6364):83-5.**
- 803 **59. Schrodinger L. The PyMOL Molecular Graphics System, Version 2.1.1. 2015.**
- 804 **60. Lee RS, Seemann T, Heffernan H, Kwong JC, Goncalves da Silva A, Carter GP,**  
805 **et al. Genomic epidemiology and antimicrobial resistance of *Neisseria gonorrhoeae* in**  
806 **New Zealand. The Journal of antimicrobial chemotherapy. 2018;73(2):353-64.**
- 807 **61. Bankevich A, Nurk S, Antipov D, Gurevich AA, Dvorkin M, Kulikov AS, et al.**  
808 **SPAdes: a new genome assembly algorithm and its applications to single-cell**  
809 **sequencing. J Comput Biol. 2012;19(5):455-77.**
- 810 **62. Darling AE, Mau B, Perna NT. progressiveMauve: multiple genome alignment**  
811 **with gene gain, loss and rearrangement. PloS one. 2010;5(6):e11147.**
- 812 **63. Seemann T. Prokka: rapid prokaryotic genome annotation. Bioinformatics.**  
813 **2014;30(14):2068-9.**



- 814 **64. Lam MMC, Wick RR, Wyres KL, Gorrie C, Judd LM, Brisse S, et al. Frequent**  
815 **emergence of pathogenic lineages of *Klebsiella pneumoniae* via mobilisation of**  
816 **yersiniabactin and colibactin. *bioRxiv*. 2017.**
- 817 **65. Page AJ, Cummins CA, Hunt M, Wong VK, Reuter S, Holden MT, et al. Roary:**  
818 **rapid large-scale prokaryote pan genome analysis. *Bioinformatics*. 2015;31(22):3691-3.**
- 819 **66. Nguyen LT, Schmidt HA, von Haeseler A, Minh BQ. IQ-TREE: a fast and**  
820 **effective stochastic algorithm for estimating maximum-likelihood phylogenies.**  
821 ***Molecular biology and evolution*. 2015;32(1):268-74.**
- 822 **67. Hadfield J, Croucher NJ, Goater RJ, Abudahab K, Aanensen DM, Harris SR.**  
823 **Phandango: an interactive viewer for bacterial population genomics. *Bioinformatics*.**  
824 **2017.**
- 825 **68. Haanperä M, Forssten SD, Huovinen P, Jalava J. Typing of SHV extended-**  
826 **spectrum  $\beta$ -lactamases by pyrosequencing in *Klebsiella pneumoniae* strains with**  
827 **chromosomal SHV  $\beta$ -lactamase. *Antimicrobial agents and chemotherapy*.**  
828 **2008;52(7):2632-5.**
- 829 **69. Babini GS, Livermore DM. Are SHV  $\beta$ -lactamases universal in *Klebsiella***  
830 ***pneumoniae*? *Antimicrobial agents and chemotherapy*. 2000;44(8):2230.**

- 831 **70. Hæggman S, Löfdahl S, Paauw A, Verhoef J, Brisse S. Diversity and evolution of**  
832 **the class A chromosomal  $\beta$ -lactamase gene in *Klebsiella pneumoniae*. Antimicrobial**  
833 **agents and chemotherapy. 2004;48(7):2400-8.**
- 834 **71. Chaves J, Ladona MG, Segura C, Coira A, Reig R, Ampurdanés C. SHV-1  $\beta$ -**  
835 **lactamase is mainly a chromosomally encoded species-specific enzyme in *Klebsiella***  
836 ***pneumoniae*. Antimicrobial agents and chemotherapy. 2001;45(10):2856-61.**
- 837 **72. EUCAST. The European Committee on Antimicrobial Susceptibility Testing.**  
838 **Breakpoint tables for interpretation of MICs and zone diameters. Version 8.0.**  
839 **[www.eucast.org](http://www.eucast.org); European Committee on Antimicrobial Susceptibility Testing; 2018.**
- 840 **73. CLSI. M100-S24. *Performance Standards for Antimicrobial Susceptibility Testing;***  
841 ***Twenty-Fourth Informational Supplement*. Clinical and Laboratory Standards Institute;**  
842 **Wayne, PA. 2014.**
- 843 **74. Garcia-Sureda L, Juan C, Domenech-Sanchez A, Alberti S. Role of *Klebsiella***  
844 ***pneumoniae* LamB Porin in antimicrobial resistance. Antimicrobial agents and**  
845 **chemotherapy. 2011;55(4):1803-5.**
- 846 **75. Kaczmarek FM, Dib-Hajj F, Shang W, Gootz TD. High-level carbapenem**  
847 **resistance in a *Klebsiella pneumoniae* clinical isolate is due to the combination of *bla*<sub>ACT-1</sub>**  
848  **$\beta$ -lactamase production, porin OmpK35/36 insertional inactivation, and down-**  
849 **regulation of the phosphate transport porin PhoE. Antimicrobial agents and**  
850 **chemotherapy. 2006;50(10):3396-406.**

- 851 76. Doménech-Sánchez A, Martínez-Martínez L, Hernández-Allés S, del Carmen  
852 Conejo M, Pascual A, Tomás JM, et al. Role of *Klebsiella pneumoniae* OmpK35 porin in  
853 antimicrobial resistance. *Antimicrobial agents and chemotherapy*. 2003;47(10):3332-5.
- 854 77. Garcia-Sureda L, Domenech-Sanchez A, Barbier M, Juan C, Gasco J, Alberti S.  
855 OmpK26, a novel porin associated with carbapenem resistance in *Klebsiella*  
856 *pneumoniae*. *Antimicrobial agents and chemotherapy*. 2011;55(10):4742-7.
- 857 78. Tsai YK, Fung CP, Lin JC, Chen JH, Chang FY, Chen TL, et al. *Klebsiella*  
858 *pneumoniae* outer membrane porins OmpK35 and OmpK36 play roles in both  
859 antimicrobial resistance and virulence. *Antimicrobial agents and chemotherapy*.  
860 2011;55(4):1485-93.
- 861 79. March C, Cano V, Moranta D, Llobet E, Perez-Gutierrez C, Tomas JM, et al.  
862 Role of bacterial surface structures on the interaction of *Klebsiella pneumoniae* with  
863 phagocytes. *PloS one*. 2013;8(2):e56847.
- 864 80. Pitout JD, Sanders CC, Sanders WE, Jr. Antimicrobial resistance with focus on  
865  $\beta$ -lactam resistance in Gram-negative bacilli. *Am J Med*. 1997;103(1):51-9.
- 866 81. Fridkin SK, Steward CD, Edwards JR, Pryor ER, McGowan JE, Jr., Archibald  
867 LK, et al. Surveillance of antimicrobial use and antimicrobial resistance in United  
868 States hospitals: project ICARE phase 2. Project Intensive Care Antimicrobial  
869 Resistance Epidemiology (ICARE) hospitals. *Clinical infectious diseases : an official*  
870 *publication of the Infectious Diseases Society of America*. 1999;29(2):245-52.

871 **82. Hidron AI, Edwards JR, Patel J, Horan TC, Sievert DM, Pollock DA, et al.**  
872 **NHSN annual update: antimicrobial-resistant pathogens associated with healthcare-**  
873 **associated infections: annual summary of data reported to the National Healthcare**  
874 **Safety Network at the Centers for Disease Control and Prevention, 2006-2007. Infection**  
875 **control and hospital epidemiology : the official journal of the Society of Hospital**  
876 **Epidemiologists of America. 2008;29(11):996-1011.**

877 **83. Wollheim C, Guerra IM, Conte VD, Hoffman SP, Schreiner FJ, Delamare AP, et**  
878 **al. Nosocomial and community infections due to class A extended-spectrum beta-**  
879 **lactamase (ESBLA)-producing *Escherichia coli* and *Klebsiella spp.* in southern Brazil.**  
880 **The Brazilian journal of infectious diseases : an official publication of the Brazilian**  
881 **Society of Infectious Diseases. 2011;15(2):138-43.**

882 **84. Doumith M, Ellington MJ, Livermore DM, Woodford N. Molecular mechanisms**  
883 **disrupting porin expression in ertapenem-resistant *Klebsiella* and *Enterobacter spp.***  
884 **clinical isolates from the UK. The Journal of antimicrobial chemotherapy.**  
885 **2009;63(4):659-67.**

886 **85. Chudácková E, Bergerová T, Fajfrlík K, Cervená D, Urbásková P, Empel J, et**  
887 **al. Carbapenem-nonsusceptible strains of *Klebsiella pneumoniae* producing SHV-5**  
888 **and/or DHA-1  $\beta$ -lactamases in a Czech hospital. FEMS microbiology letters.**  
889 **2010;309(1):62-70.**

- 890 **86. Nikaido H, Rosenberg EY. Effect on solute size on diffusion rates through the**  
891 **transmembrane pores of the outer membrane of *Escherichia coli*. J Gen Physiol.**  
892 **1981;77(2):121-35.**
- 893 **87. Jaffe A, Chabbert YA, Semonin O. Role of porin proteins OmpF and OmpC in**  
894 **the permeation of  $\beta$ -lactams. Antimicrobial agents and chemotherapy. 1982;22(6):942-8.**
- 895 **88. Nitzan Y, Deutsch EB, Pechatnikov I. Diffusion of  $\beta$ -lactam antibiotics through**  
896 **oligomeric or monomeric porin channels of some Gram-negative bacteria. Curr**  
897 **Microbiol. 2002;45(6):446-55.**
- 898 **89. Sugawara E, Kojima S, Nikaido H. *Klebsiella pneumoniae* major porins OmpK35**  
899 **and OmpK36 allow more efficient diffusion of  $\beta$ -lactams than their *Escherichia coli***  
900 **homologs OmpF and OmpC. Journal of bacteriology. 2016;198(23):3200-8.**
- 901 **90. Chen JH, Siu LK, Fung CP, Lin JC, Yeh KM, Chen TL, et al. Contribution of**  
902 **outer membrane protein K36 to antimicrobial resistance and virulence in *Klebsiella***  
903 ***pneumoniae*. The Journal of antimicrobial chemotherapy. 2010;65(5):986-90.**
- 904 **91. Tsai YK, Liou CH, Fung CP, Lin JC, Siu LK. Single or in combination**  
905 **antimicrobial resistance mechanisms of *Klebsiella pneumoniae* contribute to varied**  
906 **susceptibility to different carbapenems. PloS one. 2013;8(11):e79640.**

- 907 **92. Bedikian A, Okamoto MP, Nakahiro RK, Farino J, Heseltine PN, Appleman**  
908 **MD, et al. Pharmacokinetics of meropenem in patients with intra-abdominal infections.**  
909 **Antimicrobial agents and chemotherapy. 1994;38(1):151-4.**
- 910 **93. Condon RE, Walker AP, Hanna CB, Greenberg RN, Broom A, Pitkin D.**  
911 **Penetration of meropenem in plasma and abdominal tissues from patients undergoing**  
912 **intraabdominal surgery. Clinical infectious diseases : an official publication of the**  
913 **Infectious Diseases Society of America. 1997;24 Suppl 2:S181-3.**
- 914 **94. Hughes D, Andersson DI. Evolutionary consequences of drug resistance: shared**  
915 **principles across diverse targets and organisms. Nature reviews Genetics.**  
916 **2015;16(8):459-71.**
- 917 **95. Kaczmarek FM, Dib-Hajj F, Shang W, Gootz TD. High-level carbapenem**  
918 **resistance in a *Klebsiella pneumoniae* clinical isolate is due to the combination of *bla*<sub>ACT-1</sub>**  
919 **β-lactamase production, porin OmpK35/36 insertional inactivation, and down-**  
920 **regulation of the phosphate transport porin *phoE*. Antimicrobial agents and**  
921 **chemotherapy. 2006;50(10):3396-406.**
- 922 **96. Wise MG, Horvath E, Young K, Sahm DF, Kazmierczak KM. Global survey of**  
923 ***Klebsiella pneumoniae* major porins from ertapenem non-susceptible isolates lacking**  
924 **carbapenemases. Journal of medical microbiology. 2018;67(3):289-95.**

- 925 **97. De E, Baslé A, Jaquinod M, Saint N, Mallea M, Molle G, et al. A new mechanism**  
926 **of antibiotic resistance in *Enterobacteriaceae* induced by a structural modification of the**  
927 **major porin. *Molecular microbiology*. 2001;41(1):189-98.**
- 928 **98. Olesky M, Zhao S, Rosenberg RL, Nicholas RA. Porin-mediated antibiotic**  
929 **resistance in *Neisseria gonorrhoeae*: ion, solute, and antibiotic permeation through PIB**  
930 **proteins with penB mutations. *Journal of bacteriology*. 2006;188(7):2300-8.**
- 931 **99. Lou H, Chen M, Black SS, Bushell SR, Ceccarelli M, Mach T, et al. Altered**  
932 **antibiotic transport in OmpC mutants isolated from a series of clinical strains of multi-**  
933 **drug resistant *E. coli*. *PloS one*. 2011;6(10):e25825.**
- 934 **100. Bredin J, Saint N, Mallea M, De E, Molle G, Pagès JM, et al. Alteration of pore**  
935 **properties of *Escherichia coli* OmpF induced by mutation of key residues in anti-loop 3**  
936 **region. *Biochem J*. 2002;363(Pt 3):521-8.**
- 937 **101. Thiolas A, Bornet C, Davin-Regli A, Pagès JM, Bollet C. Resistance to imipenem,**  
938 **cefepime, and cefpirome associated with mutation in Omp36 osmoporin of *Enterobacter***  
939 ***aerogenes*. *Biochem Biophys Res Commun*. 2004;317(3):851-6.**
- 940 **102. Sugawara E, Kojima S, Nikaido H. *Klebsiella pneumoniae* major porins OmpK35**  
941 **and OmpK36 allow more efficient diffusion of  $\beta$ -Lactams than their *Escherichia coli***  
942 **homologs OmpF and OmpC. *Journal of bacteriology*. 2016;198(23):3200-8.**

- 943 **103. Bornet C, Saint N, Fetnaci L, Dupont M, Davin-Regli A, Bollet C, et al. Omp35,**  
944 **a new *Enterobacter aerogenes* porin involved in selective susceptibility to**  
945 **cephalosporins. *Antimicrobial agents and chemotherapy*. 2004;48(6):2153-8.**
- 946 **104. Woodford N, Turton JF, Livermore DM. Multiresistant Gram-negative bacteria:**  
947 **the role of high-risk clones in the dissemination of antibiotic resistance. *FEMS***  
948 **microbiology reviews. 2011;35(5):736-55.**
- 949 **105. Wright LL, Turton JF, Livermore DM, Hopkins KL, Woodford N. Dominance**  
950 **of international 'high-risk clones' among metallo-beta-lactamase-producing**  
951 ***Pseudomonas aeruginosa* in the UK. *The Journal of antimicrobial chemotherapy*.**  
952 **2015;70(1):103-10.**
- 953 **106. Andersson DI, Hughes D. Microbiological effects of sublethal levels of**  
954 **antibiotics. *Nature reviews Microbiology*. 2014;12(7):465-78.**
- 955 **107. Yang Y, Song W, Lin H, Wang W, Du L, Xing W. Antibiotics and antibiotic**  
956 **resistance genes in global lakes: A review and meta-analysis. *Environment***  
957 **international. 2018;116:60-73.**
- 958 **108. Pulzova L, Navratilova L, Comor L. Alterations in outer membrane**  
959 **permeability favor drug-resistant phenotype of *Klebsiella pneumoniae*. *Microbial drug***  
960 **resistance. 2017;23(4):413-20.**



961 **109. Elena SF, Lenski RE. Evolution experiments with microorganisms: the dynamics**  
962 **and genetic bases of adaptation. Nature reviews Genetics. 2003;4(6):457-69.**

963 **110. Harder KJ, Nikaido H, Matsubashi M. Mutants of *Escherichia coli* that are**  
964 **resistant to certain beta-lactam compounds lack the *ompF* porin. Antimicrobial agents**  
965 **and chemotherapy. 1981;20(4):549-52.**

966 **111. Hasegawa Y, Yamada H, Mizushima S. Interactions of outer membrane proteins**  
967 **O-8 and O-9 with peptidoglycan sacculus of *Escherichia coli* K-12. Journal of**  
968 **biochemistry. 1976;80(6):1401-9.**

969 **112. Matsubara M, Kitaoka SI, Takeda SI, Mizuno T. Tuning of the porin expression**  
970 **under anaerobic growth conditions by his-to-Asp cross-phosphorelay through both the**  
971 **EnvZ-osmosensor and ArcB-anaerosensor in *Escherichia coli*. Genes to cells : devoted**  
972 **to molecular & cellular mechanisms. 2000;5(7):555-69.**

973 **113. Heyde M, Portalier R. Regulation of major outer membrane porin proteins of**  
974 ***Escherichia coli* K 12 by pH. Molecular & general genetics : MGG. 1987;208(3):511-7.**

975 **114. Giraud A, Arous S, De Paepe M, Gaboriau-Routhiau V, Bambou JC, Rakotobe**  
976 **S, et al. Dissecting the genetic components of adaptation of *Escherichia coli* to the mouse**  
977 **gut. PLoS genetics. 2008;4(1):e2.**

978

## 979 Supplemental information

980 **Figure S1: S1/PFGE of strains with the conjugated plasmids.** White arrows show the  
981 plasmids in original host isolates and transconjugants. MW; Mid-range PFG Marker.

982 **Figure S2: *In vitro* and *in vivo* competition experiments in *K. pneumoniae* ATCC 13883,**  
983 **10.85 and 11.76 knock-out porin mutants.** The relative fitness of deletion porin mutants in  
984 comparison with parental strain (ATCC 13883, 10.85 or 11.76) was performed by  
985 competition experiments in co-cultures and expressed as a percentage of the mutant or wild  
986 type cells versus total population at each time point. *In vitro* growth conditions, MH broth,  
987 37°C. Panels 1, 3 and 4 represent *in vitro* competition experiments for ATCC 13383, 10.85  
988 and 11.76, respectively. Panels in row 2 show *in vivo* competition experiments for ATCC  
989 13383. For *in vivo* competition experiments, the values for each mouse are represented  
990 individually. Violet diamond, ATCC 13883, 10.85 or 11.76 wild type strains. Orange square,  
991  $\Delta$ OmpK35 mutant. Red square,  $\Delta$ OmpK36 mutant. Blue circle,  $\Delta$ OmpK35 $\Delta$ OmpK36 mutant.

992 **Figure S3: Individual gut colonization.** *K. pneumoniae* intestinal colonization in a mouse  
993 model. CFU counts of *K. pneumoniae* ATCC 13883 and porin mutants from mice faecal  
994 sample. Bacterial inoculum at day 0 is  $1 \times 10^{10}$  CFU /mouse. Addition of ampicillin 0.5 g / L  
995 in the drinking water on day 4. Violet diamond, ATCC 13883 wild type strains. Orange  
996 square,  $\Delta$ OmpK35 mutant. Red square,  $\Delta$ OmpK36 mutant. Blue circle,  $\Delta$ OmpK35 $\Delta$ OmpK36  
997 mutant. Green square, OmpK36GD mutant. Pink circle,  $\Delta$ OmpK35OmpK36GD mutant.

998 **Fig S4: Alignment of *Klebsiella pneumoniae* OmpK36 proteins.** 26 unique sequences with  
999 OmpK36 L3 variants from GenBank were compared with OmpK36 of NTUH\_K2044.  
1000 Isolates with wild-type L3 sequence are not included. Dot line, signal peptide. Black line,  
1001 beta strands. Red line, loops. Blue line, alpha helix. Green squares, turns. OmpK36 secondary

1002 structure based on previous studies. (1, 2). Red boxes, residues involved in the pore eyelet  
1003 based on (3). Black box, L3 variants.

1004 1. Cowan SW, Schirmer T, Rummel G, Steiert M, Ghosh R, Pauptit RA, et al. Crystal  
1005 structures explain functional properties of two *E. coli* porins. *Nature*. 1992;358(6389):727-33.

1006 2. Domenech-Sanchez A, Hernandez-Alles S, Martinez-Martinez L, Benedi VJ,  
1007 Alberti S. Identification and characterization of a new porin gene of *Klebsiella pneumoniae*:  
1008 its role in  $\beta$ -lactam antibiotic resistance. *J Bacteriol*. 1999;181(9):2726-32.

1009 3. Bornet C, Saint N, Fetnaci L, Dupont M, Davin-Regli A, Bollet C, et al. Omp35, a  
1010 new *Enterobacter aerogenes* porin involved in selective susceptibility to cephalosporins.  
1011 *Antimicrob Agents Chemother*. 2004;48(6):2153-8.

1012 **Figure S5: Proposed scenario of the major duplications observed in OmpK36 loop 3.**

1013 Based on observations of the codon sequences, the extra –SD and –SYG following GGD  
1014 likely result from a combination of duplication followed by point mutation.

1015 **Figure S6: Phylogenetic tree of an Australian collection of *K. pneumoniae* isolates with  
1016 various degrees of non-susceptibility to carbapanems.** Metadata includes year of isolation;

1017 MIC levels for ETP: ertapenem, IMP: imipenem, and MEM: meropenem; *ompK36* L3  
1018 mutation; *ompK35* disrupted mutations (as listed in Table S7); ST: sequence type; number of  
1019 predicted resistance genes encoded; carbapenamase gene encoded; ESBL: extended-spectrum  
1020 beta-lactamase gene encoded.

1021 **Figure S7: Imbalanced features of the 1,557 *Klebsiella pneumoniae* genomes found in**  
1022 **Genbank** (February 2017). Bubble chart showing the distribution of isolates across countries  
1023 with at least 2 *Klebsiella pneumoniae* genomes reported, from 2001 to 2016, and coloured  
1024 according to their MLST. The size of each circle is proportional to the number of isolates.

1025 **Figure S8: Extended mosaic plot of the observed proportions of isolates with porins**  
1026 **OmpK35 and OmpK36 variations, across STs harbouring *ompK36* GD/TD variants.**

1027 The mosaic plot shows the relationships between 3 variables; ST (in purple) and  
1028 presence/absence of *ompK35* (in black) on the *x*-axis; and presence/absence and mutations of  
1029 *ompK36* (in grey) on the *y*-axis. The size of each plot tile is proportional to counts. Plot tiles  
1030 are colored according to their standardized Pearson residuals, as determined by a log-linear  
1031 model. Deeper shades of red and blue corresponding to a standardized residual less than -4 or  
1032 greater than +4, respectively, can be interpreted as combinations observed significantly less  
1033 or more than expected (under the assumptions that proportions have equal levels).

1034 **Figure S9: Extended mosaic plot of the observed proportions of isolates with porins**  
1035 **OmpK35 and OmpK36 variations versus years.** The mosaic plots show the relationships

1036 between 2 variables; A) year of isolation on the *x*-axis and presence/absence of *ompK35* on  
1037 the *y*-axis; B) year of isolation on the *x*-axis, and presence/absence and mutations of *ompK36*  
1038 on the *y*-axis. The size of each plot tile is proportional to counts. Plot tiles are colored  
1039 according to their standardized Pearson residuals, as determined by a log-linear model.  
1040 Deeper shades of red and blue corresponding to a standardized residual less than -4 or greater  
1041 than +4, respectively, can be interpreted as combinations observed significantly less or more  
1042 than expected (under the assumptions that proportions have equal levels).

1043 **Figure S10: Extended mosaic plot of the observed proportions of isolates with porins**

1044 **OmpK35 and OmpK36 variations versus countries.** The mosaic plots show the  
1045 relationships between 2 variables; A) country of isolation on the *x*-axis and presence/absence

1046 of *ompK35* on the *y*-axis; B) country of isolation on the *x*-axis, and presence/absence and  
1047 mutations of *ompK36* on the *y*-axis. The size of each plot tile is proportional to counts. Plot  
1048 tiles are colored according to their standardized Pearson residuals, as determined by a log-  
1049 linear model. Deeper shades of red and blue corresponding to a standardized residual less  
1050 than -4 or greater than +4, respectively, can be interpreted as combinations observed  
1051 significantly less or more than expected (under the assumptions that proportions have equal  
1052 levels).

1053 **Figure S11: Distribution of resistance genes identified in ST harbouring OmpK36GD or**  
1054 **OmpK36TD mutants.** Boxplots were used to display the distribution of resistance genes  
1055 identified with Abricate within each ST with the following OmpK36 variants, namely isolates  
1056 with -GD in bright red, -TD in brown, or no insertion (-) in grey. Mean comparison *p*-values  
1057 are also shown for each ST (Wilcoxon test, with '-' used as a reference group; ns:  $p > 0.05$ ; \*:  
1058  $p \leq 0.05$ ; \*\*:  $p \leq 0.01$ ; \*\*\*:  $p \leq 0.001$ ; \*\*\*\*:  $p \leq 0.0001$ ). In addition, the corresponding  
1059 underlying isolate population is also visualised as individual points, coloured according to  
1060 OmpK35 type, (1) intact in turquoise or (0) disrupted in coral.

1061 **Figure S12: SDS-PAGE analysis of outer membrane porins.** Wild type strains ATCC  
1062 13883, 10.85 and 11.76 were cultured under different temperatures (37°C, 30°C and 25°C)  
1063 and different nutrient concentrations (MH and MH 1:10). Blue arrow, OmpK35. Black arrow,  
1064 OmpK36. Red arrow, OmpA.

1065 **Figure S13: *In vitro* competition experiments in MH 1:10 dilution.** The relative fitness of  
1066 porin mutants in comparison with parental strain ATCC 13883 was performed by competition  
1067 experiments in co-cultures and expressed as a percentage of the mutant or wild type cells  
1068 versus total population at each time point. *In vitro* growth conditions: A, MH 1:10 broth,

1069 25°C; B, MH 1:10 broth, 37°C. Violet diamond, ATCC 13883. Orange square,  $\Delta$ OmpK35.  
1070 Red square,  $\Delta$ OmpK36.

1071 **Figure S14: Distinct channel restrictions of OmpK36 di-nucleotide mutants (–GD, –TD,**  
1072 **and –SD).** Comparison of the reference OmpK36 structure under PDB accession 5nup1A  
1073 (WT, wild type) against predicted structural models of mutants harbouring a di-nucleotide  
1074 insertion in loop 3 after G113, namely GGDGD, GGDTD and GGSD. For each predicted  
1075 structure, the 2 most protruding amino-acids resulting from the di-nucleotide insertion were  
1076 marked and coloured according to their backbone structure (carbons in yellow, oxygens in  
1077 red and nitrogens in blue).

1078 **Figure S15: A. Alignment of *E. coli* OmpC\_L3 variants.** 11 unique Omp36\_L3 variants  
1079 from GenBank were compared with L3 of OmpC of K-12 MG1655 (NP\_416719). Black  
1080 boxes, residues different from NP\_416719. **B. Alignment of *E. aerogenes* Omp36\_L3**  
1081 **variants.** Four unique Omp36\_L3 variants from GenBank were compared with L3 of  
1082 Omp36 from ATCC 13048 (AF335467). Black boxes, residues different from AF335467.

1083 Isolates with wild-type L3 sequence are not included. Black line, loop 3. OmpK36 L3  
1084 location based on previous studies. (1, 2). Red boxes, residues involved in the pore eyelet  
1085 based on (3).

1086 1. Cowan SW, Schirmer T, Rummel G, Steiert M, Ghosh R, Pauptit RA, et al. Crystal  
1087 structures explain functional properties of two *E. coli* porins. *Nature*. 1992;358(6389):727-33.

1088 2. Domenech-Sanchez A, Hernandez-Alles S, Martinez-Martinez L, Benedi VJ, Alberti S.  
1089 Identification and characterization of a new porin gene of *Klebsiella pneumoniae*: its role in  
1090  $\beta$ -lactam antibiotic resistance. *J Bacteriol*. 1999;181(9):2726-32.

1091 3. Bornet C, Saint N, Fetnaci L, Dupont M, Davin-Regli A, Bollet C, et al. Omp35, a new  
1092 Enterobacter aerogenes porin involved in selective susceptibility to cephalosporins.  
1093 Antimicrob Agents Chemother. 2004;48(6):2153-8.

1094

1095 **Table S1: Primers and plasmids used during this work.**

1096 **Table S2: Genbank metadata.**

1097 **Table S3: Resistance and typing screening.**

1098 **Table S4: Antibiotic MICs against *K. pneumoniae* and porin mutants.**

1099 **Table S5: Real-time RT-PCR in *K. pneumoniae* ATCC 13883 and 10.85 porin mutants.**

1100 The expression of *rpoD* was used to normalize the results. The levels of expression of each

1101 mutant are shown relative to the wild type strain ATCC 13883 or 10.85.

1102 **Table S6: Relative growth rate and doubling time of *K. pneumoniae* and porin mutants.**

1103 **Table S7: Model evaluation results ATCC 13883 OmpK36 L3variants.**

ATCC 13883

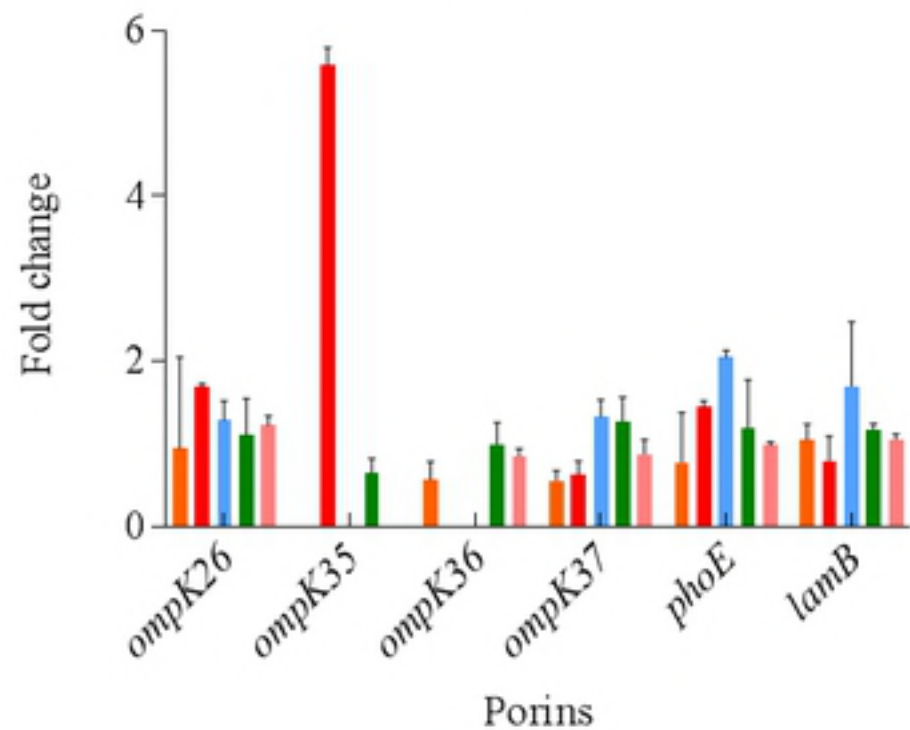

10.85

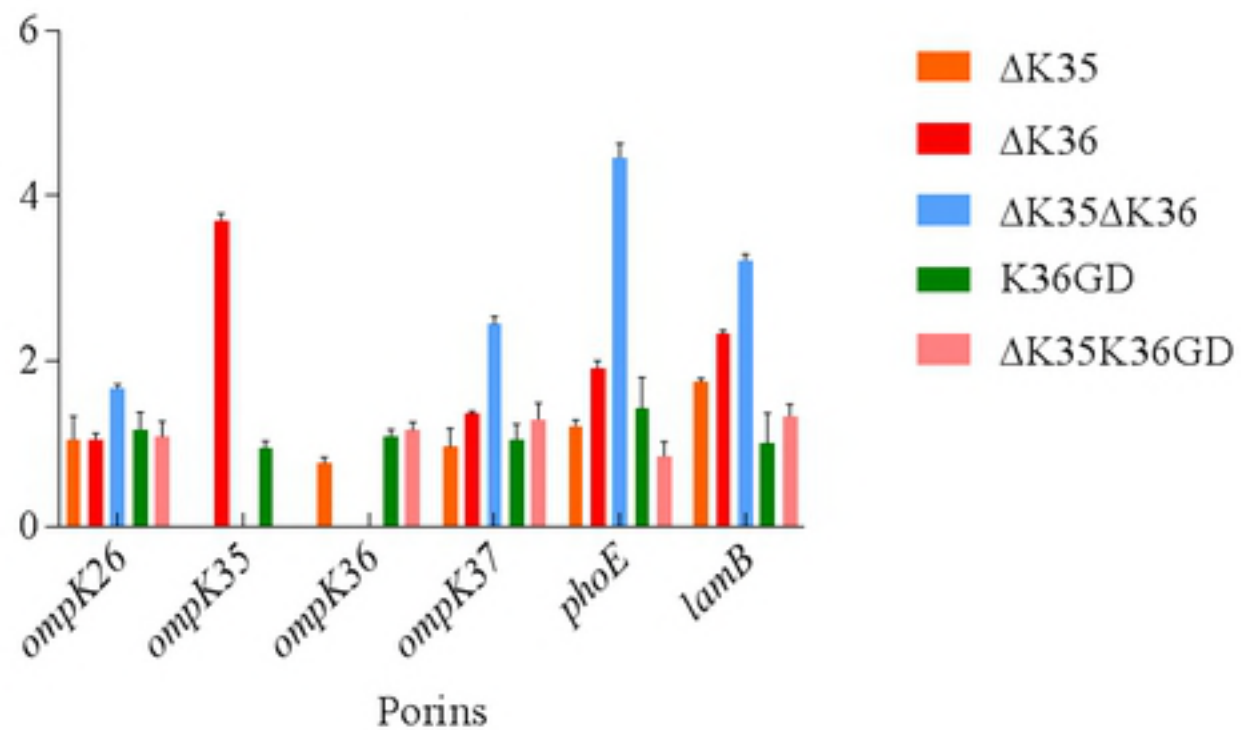



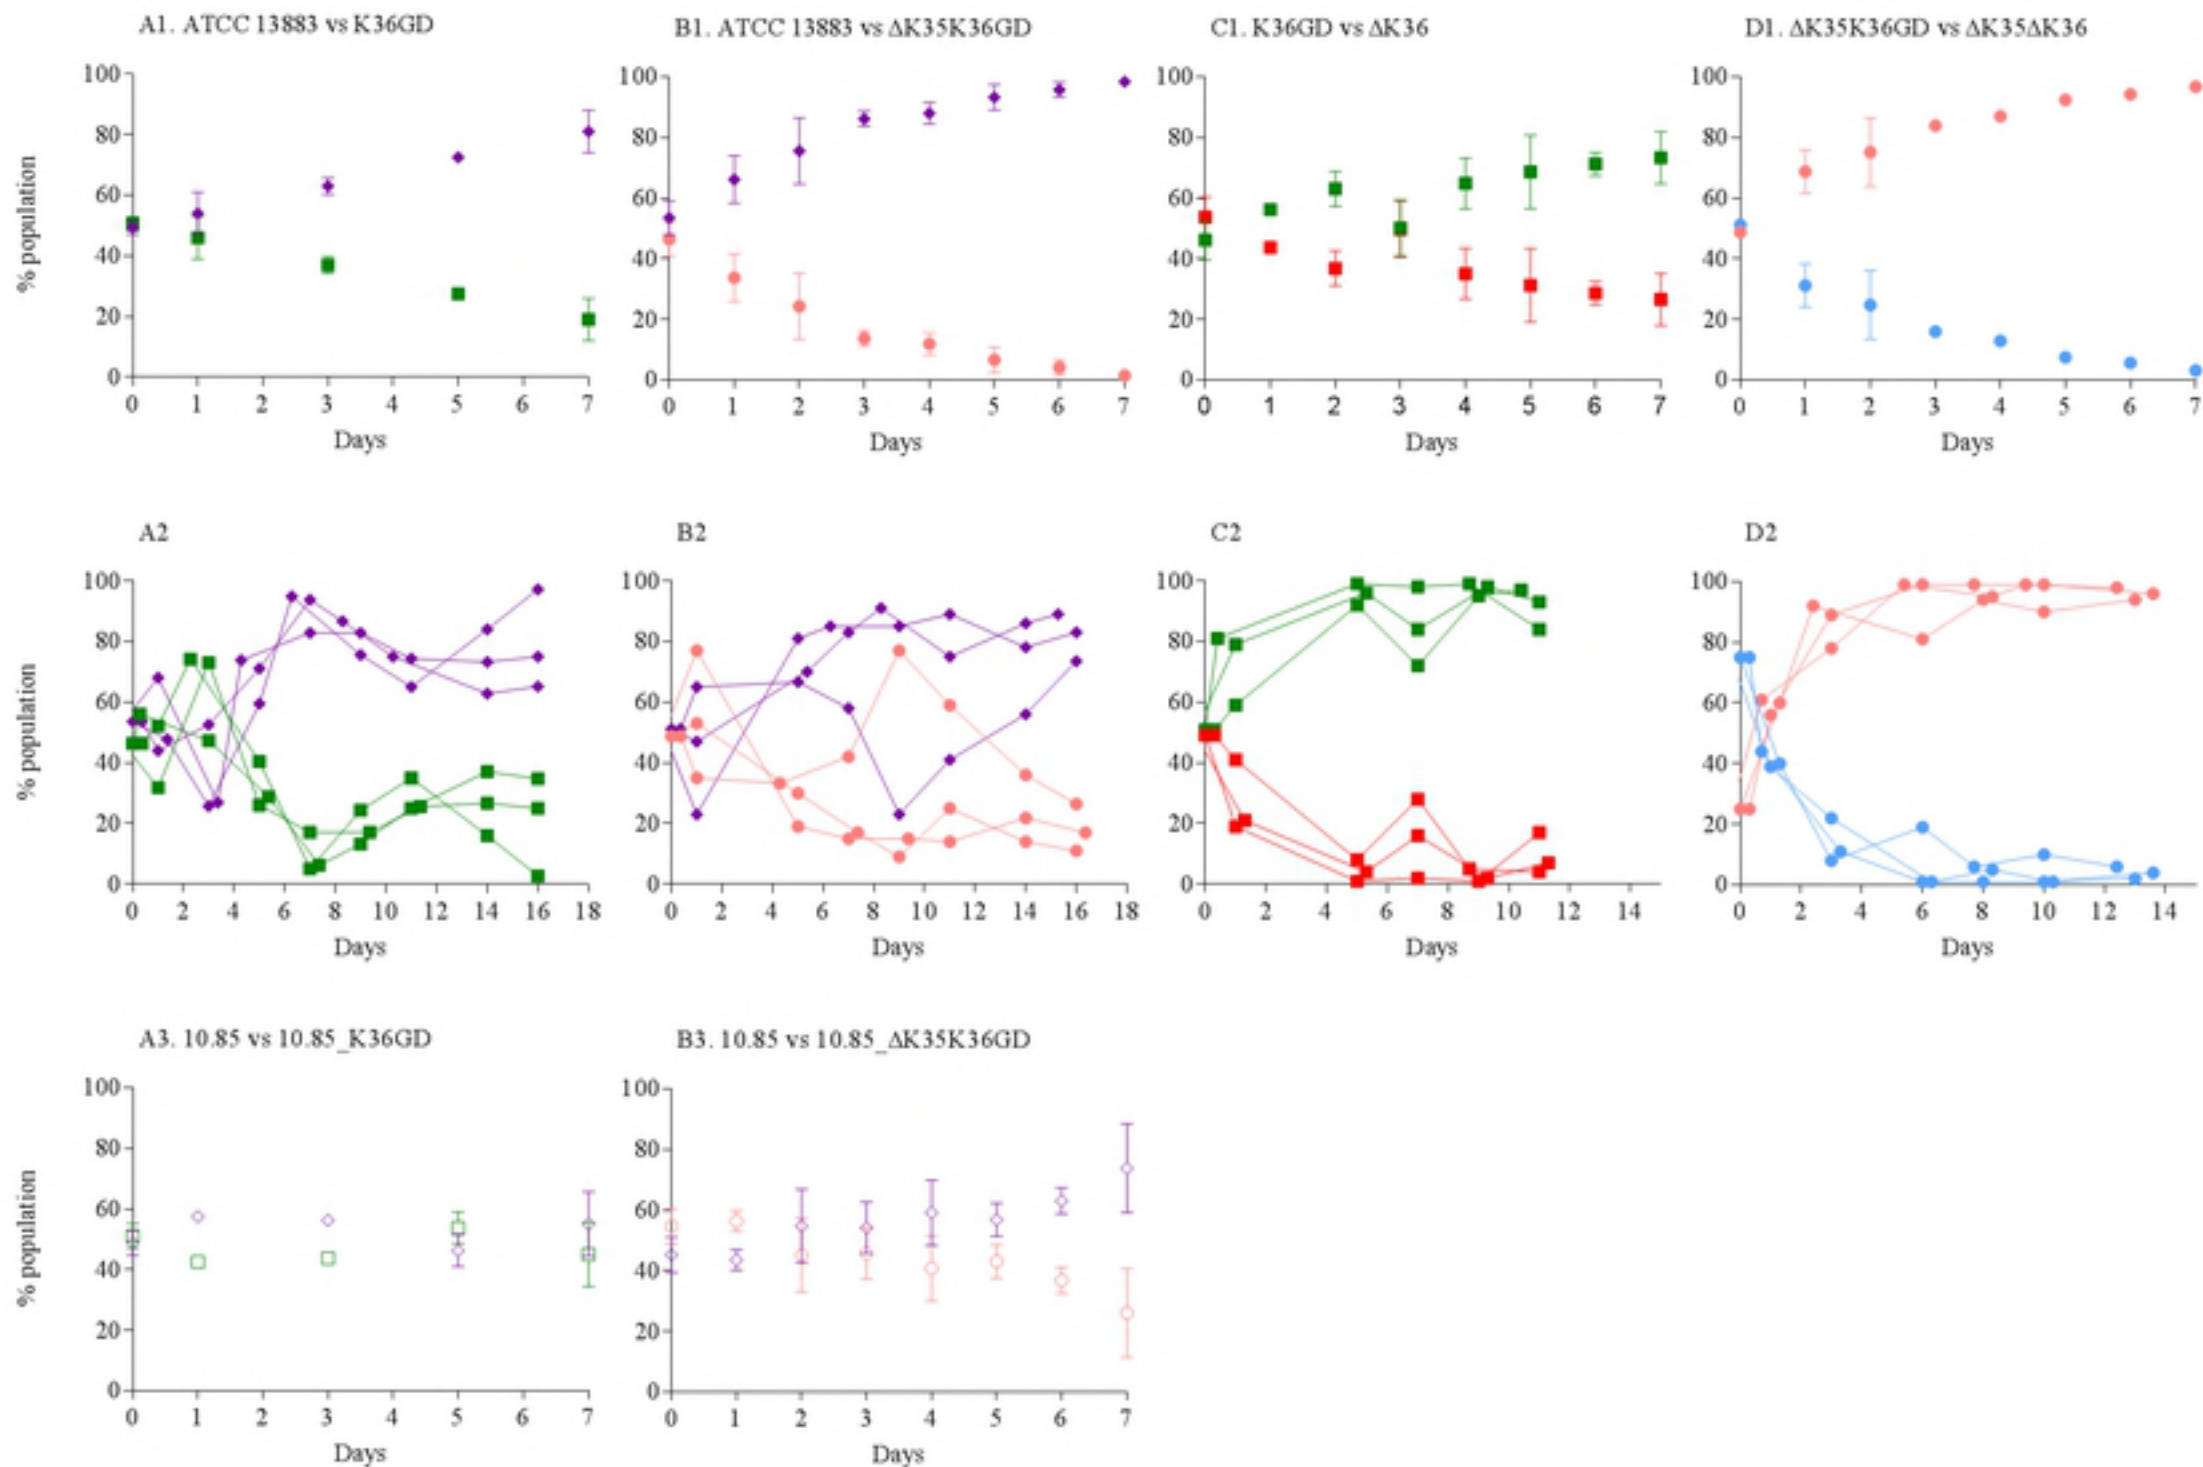

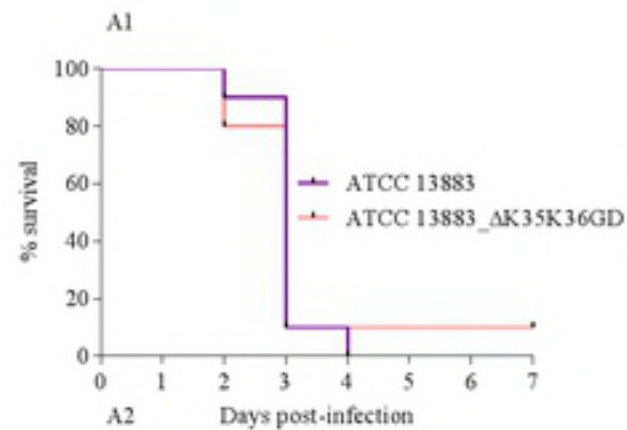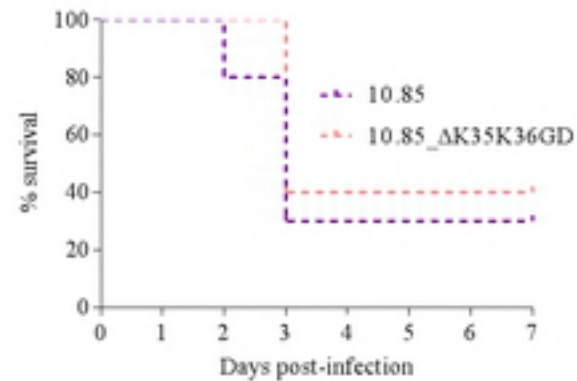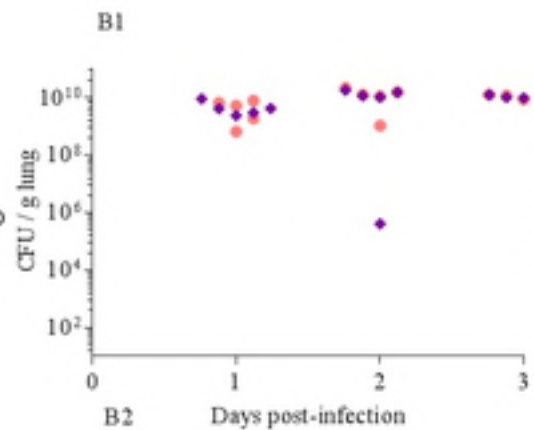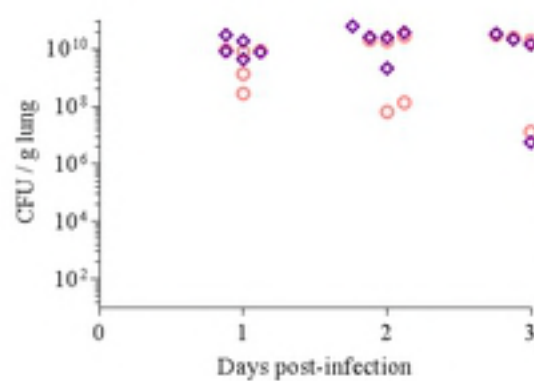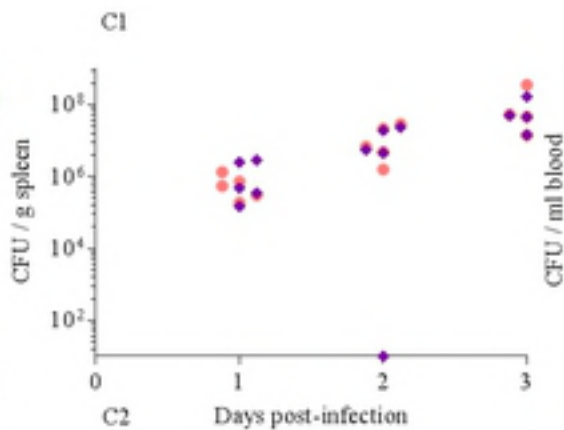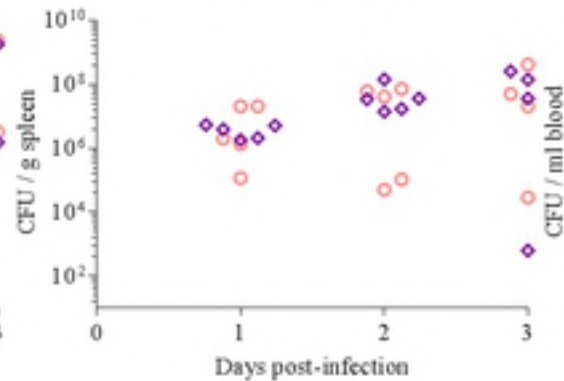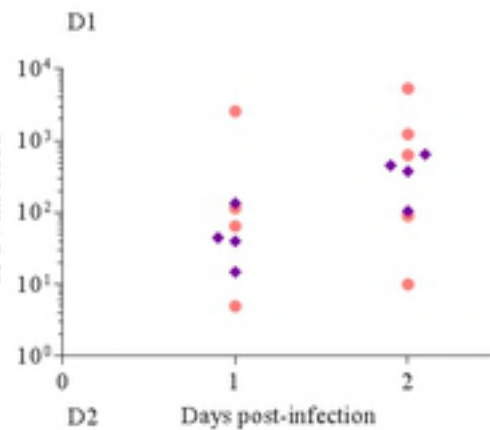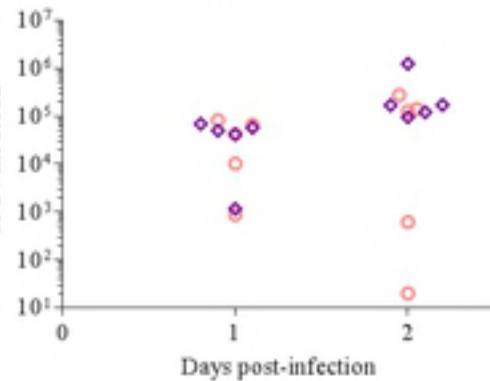

A

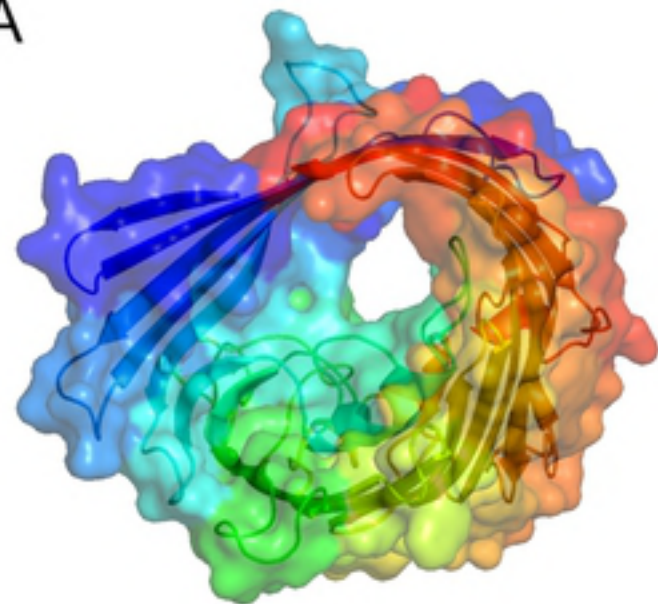

5nup\_A

B

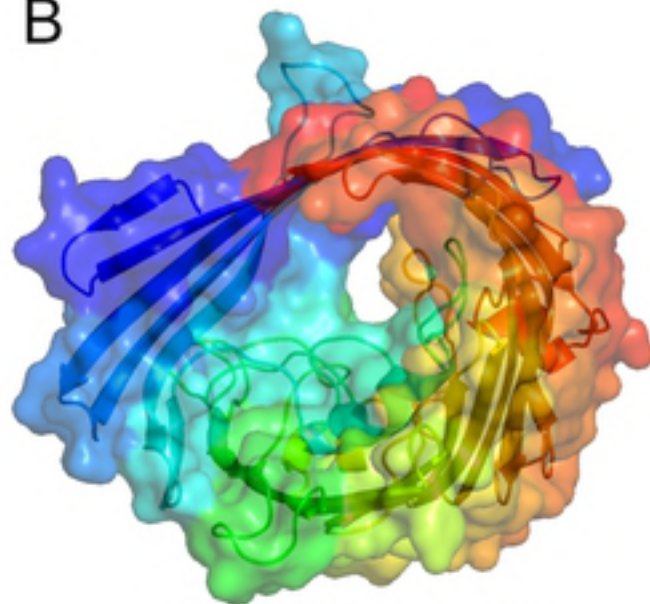

ATCC 13883 OmpK36

C

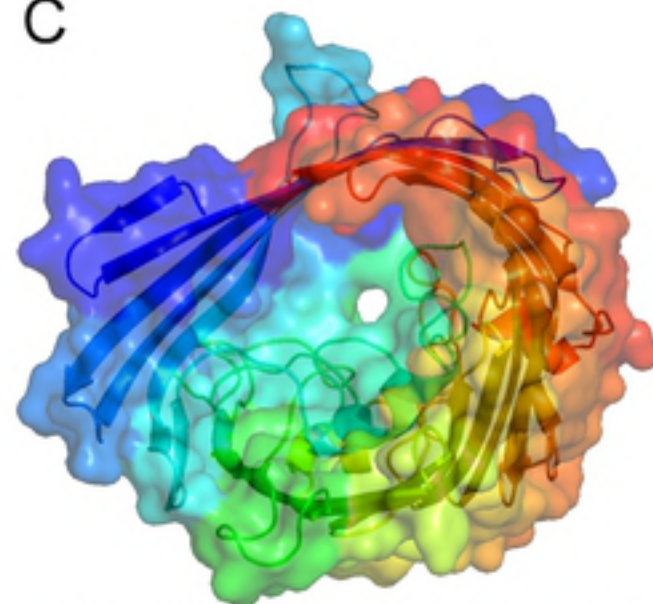

ATCC 13883 OmpK36 (GD mutation)

D

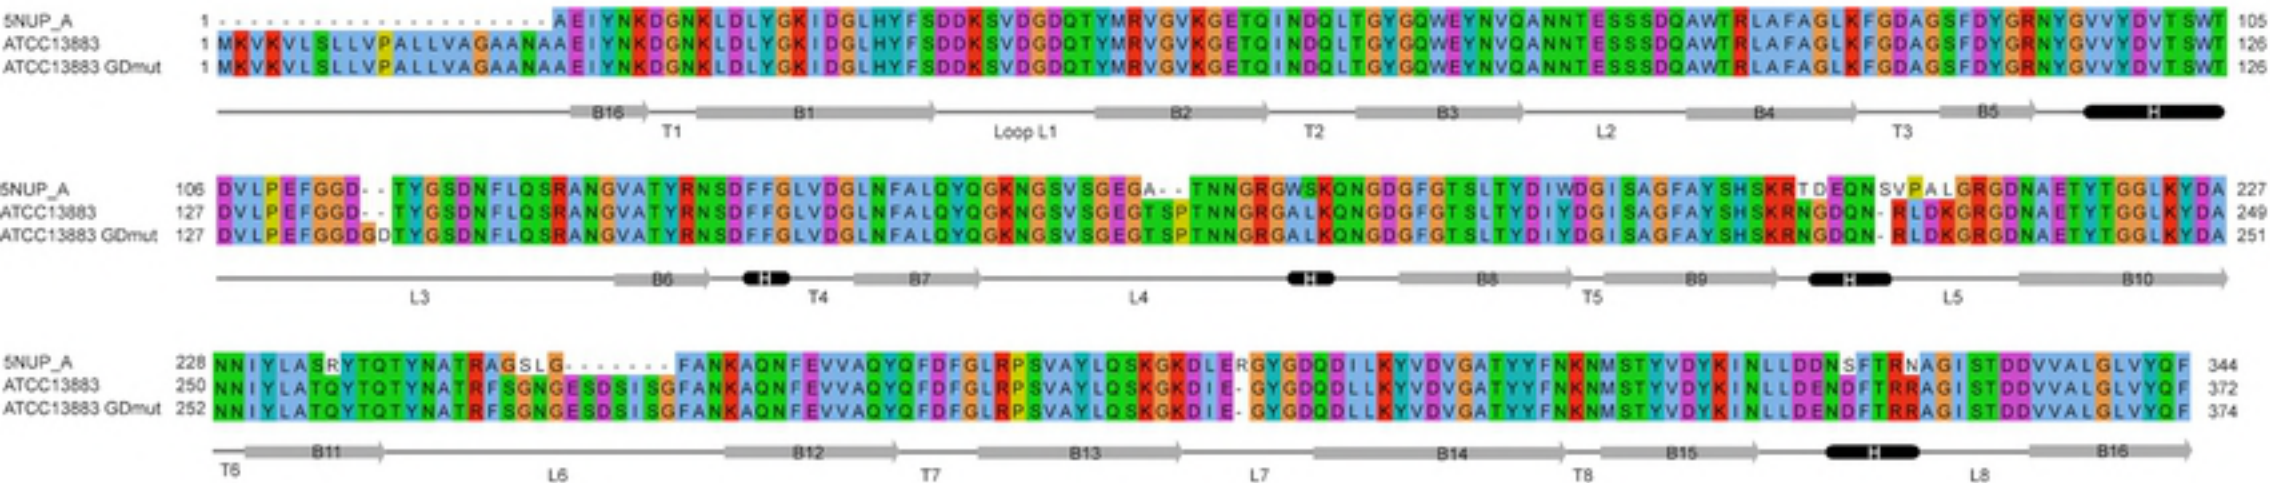

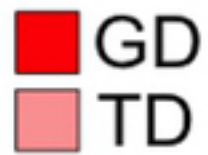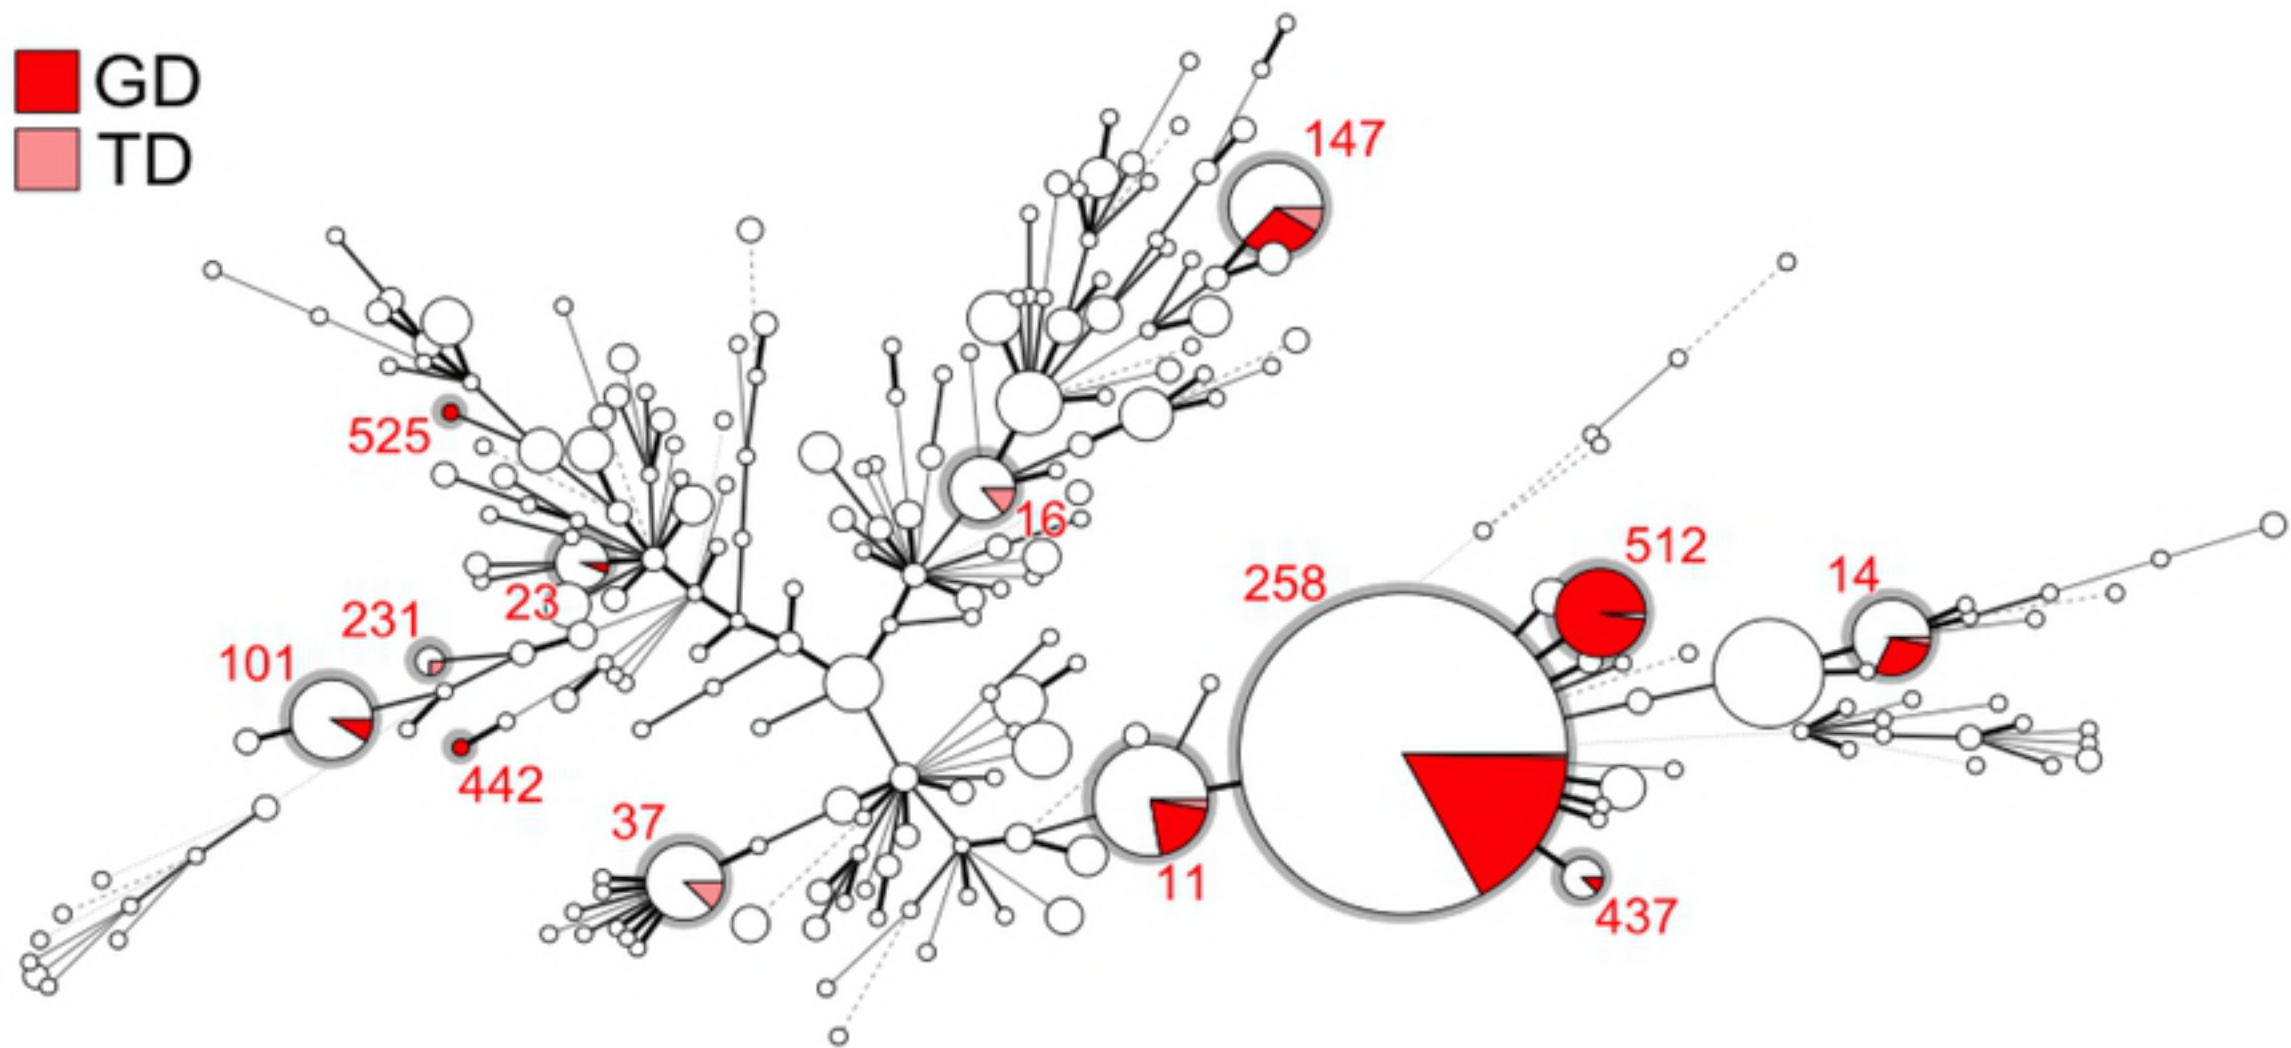

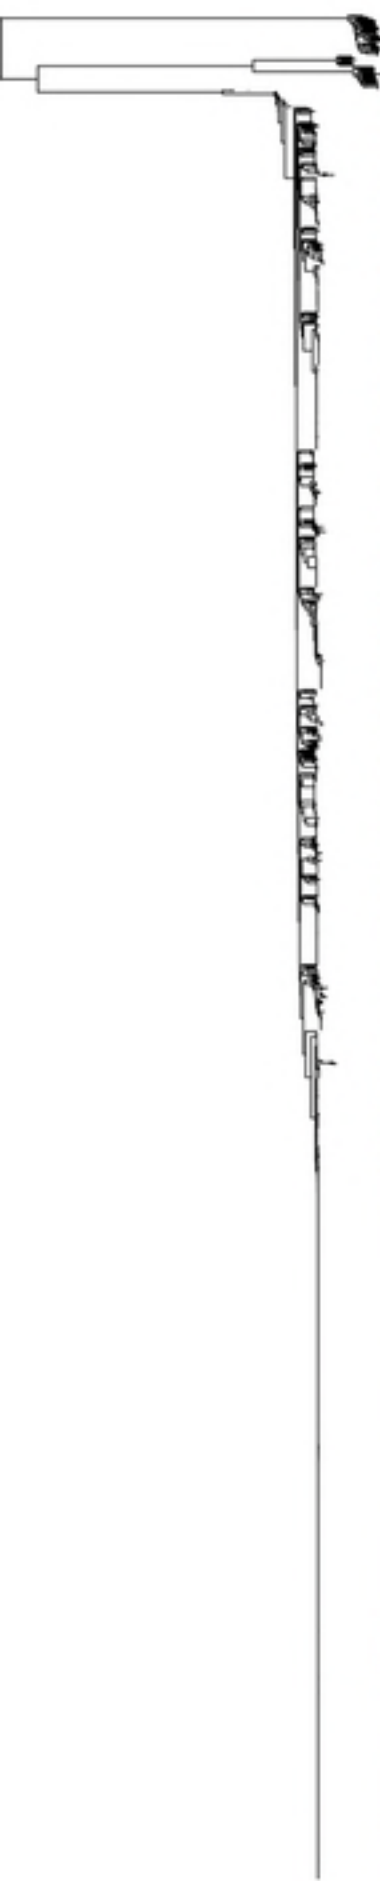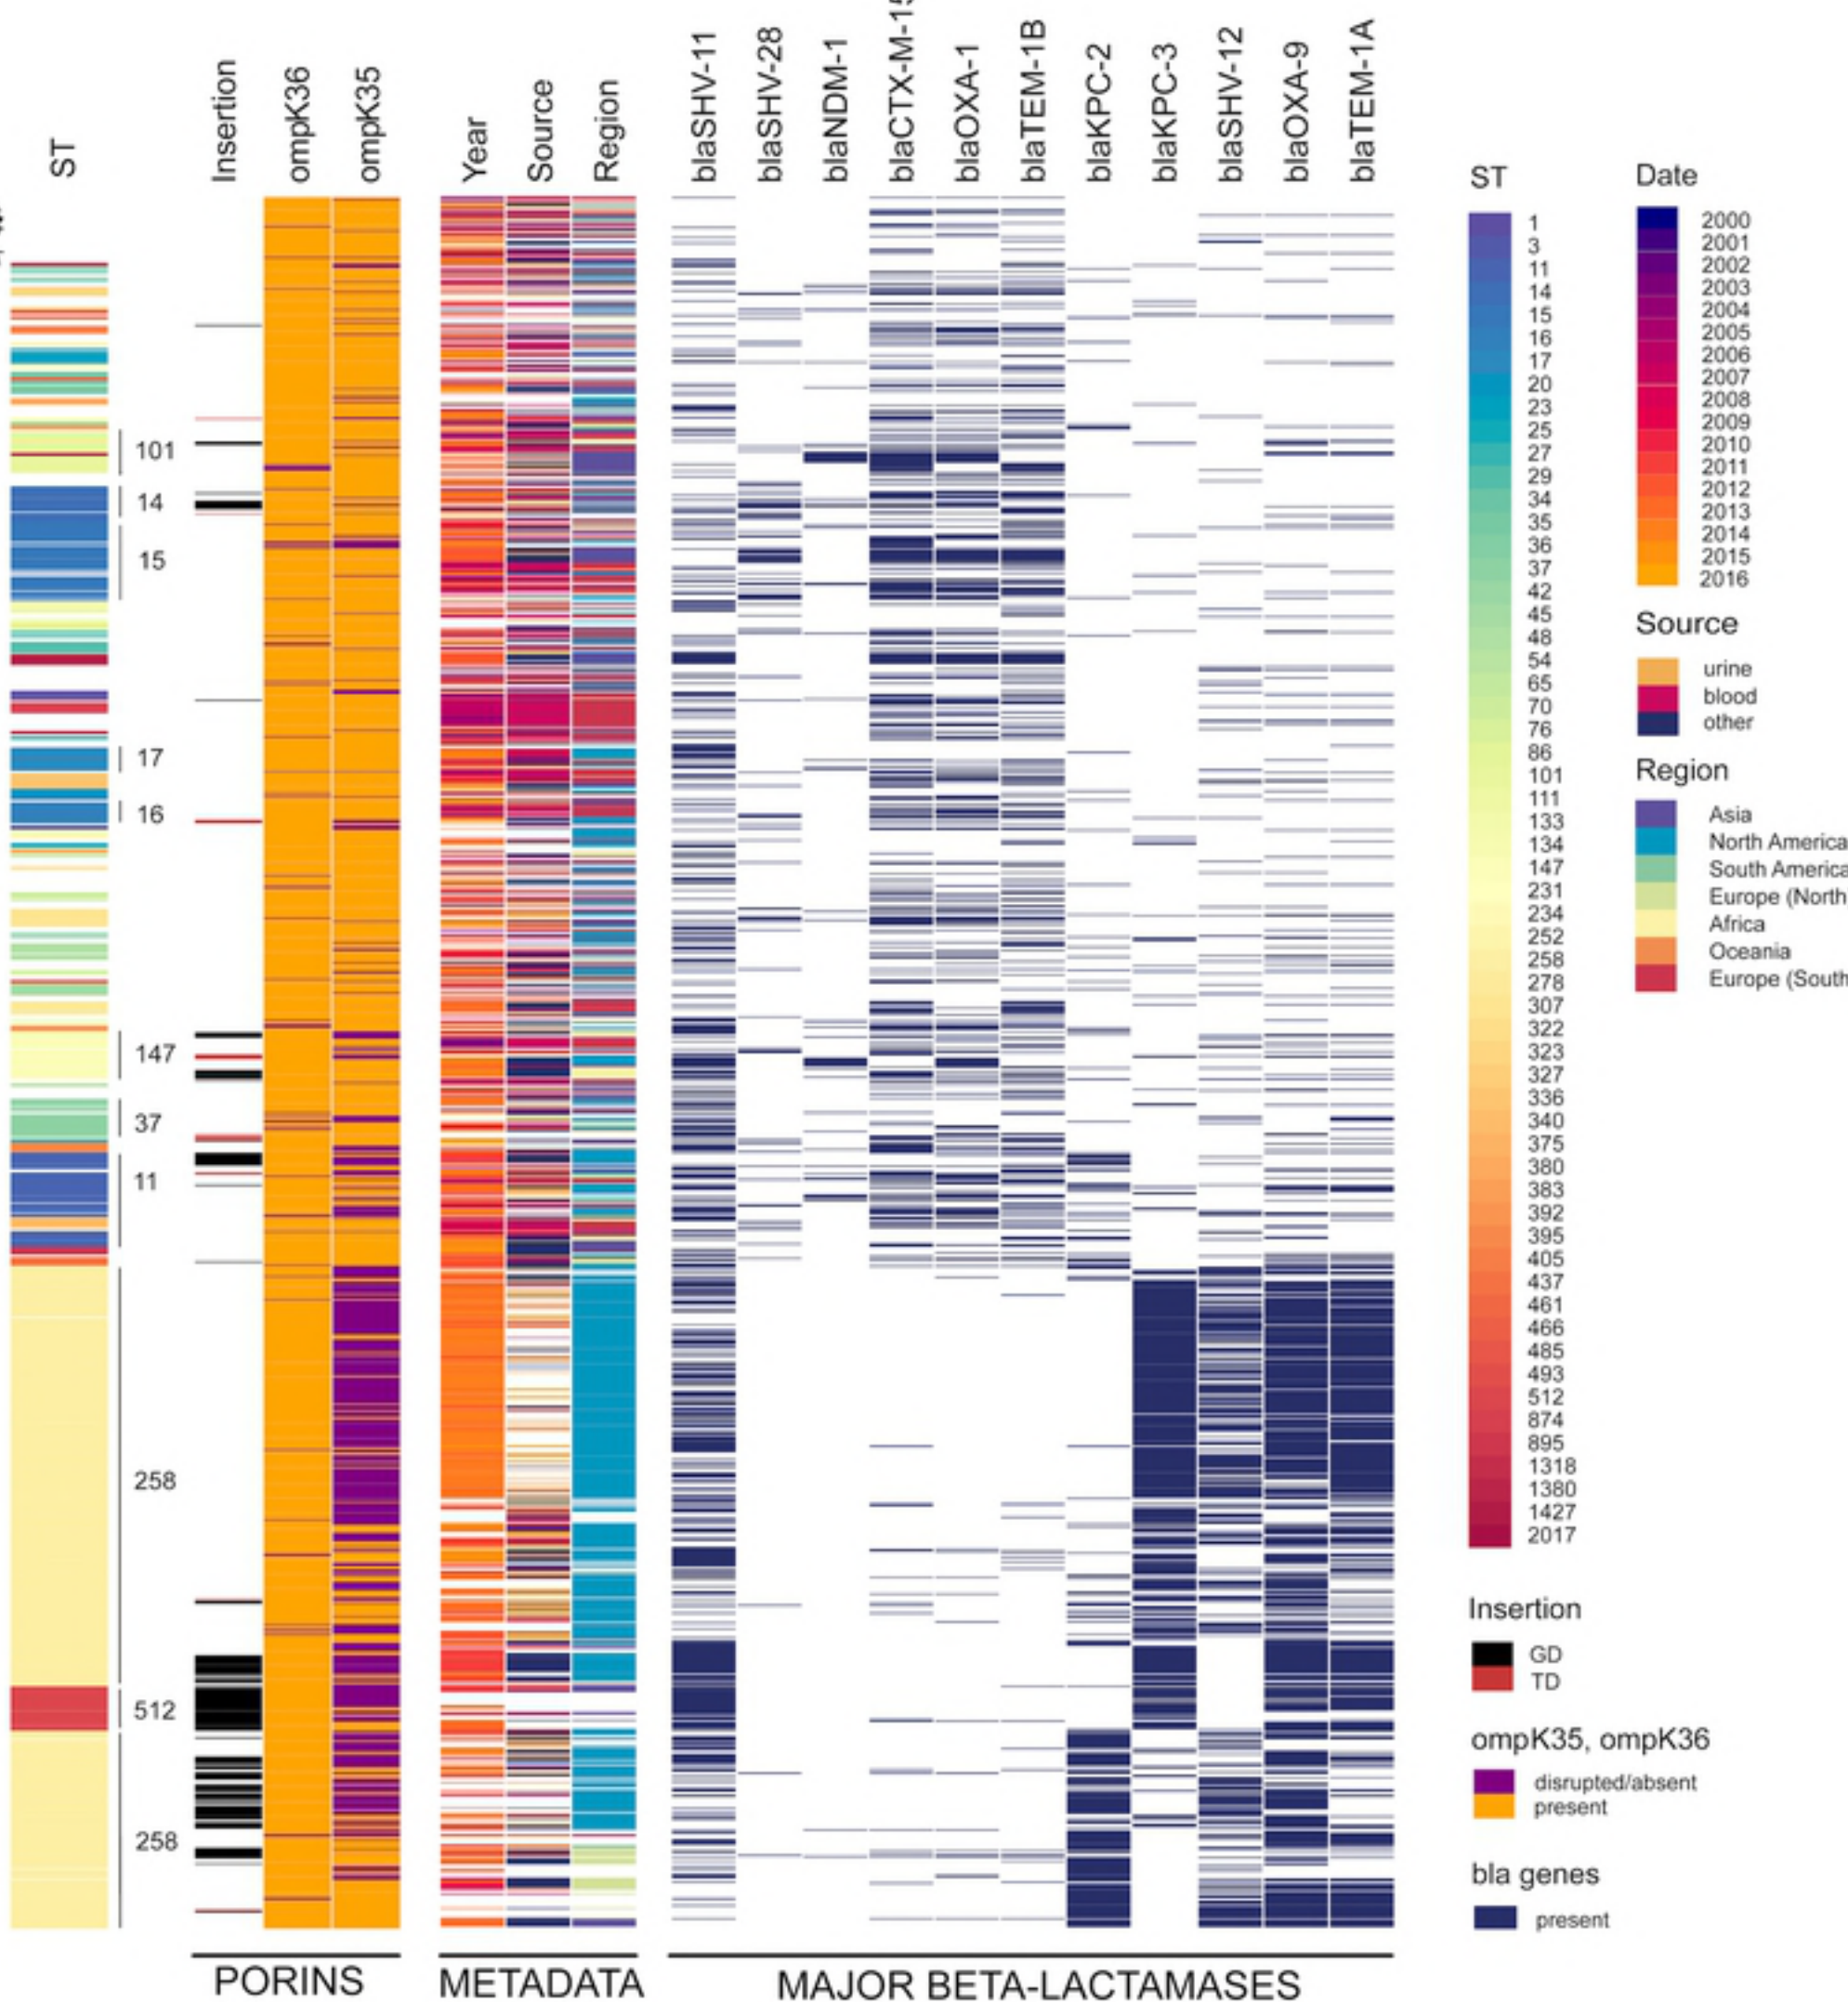

Source: http://biorxiv.org/content/10.1101/370940v1.full.pdf
